A parasitoid wasp of *Drosophila* employs preemptive and reactive strategies to deplete its host's blood cells

Johnny R. Ramroop<sup>1,2,4</sup>, Mary Ellen Heavner<sup>1,3</sup>, Zubaidul H. Razzak<sup>1</sup>,  
Shubha Govind<sup>1,2,3,\*</sup>

**Author affiliations:** <sup>1</sup>Biology Department, The City College of the City University of New York, 160 Convent Avenue, New York, NY 10031, USA

<sup>2</sup>PhD Program in Biology and <sup>3</sup>PhD Program in Biochemistry; The Graduate Center, 365 Fifth Avenue, New York, NY 10016, USA

Present address:

<sup>4</sup>Departments of Cancer Biology and Genetics, Comprehensive Cancer Center, Columbus, The Ohio State University, OH 43210 USA

JR: 0000-0003-1574-2106  
MH: 0000-0003-4625-4228  
ZR: 0000-0002-2507-9005  
SG: 0000-0002-6436-639X

\***Author for correspondence:** e-mail: [sgovind@ccny.cuny.edu](mailto:sgovind@ccny.cuny.edu)

Telephone Number: +1 212 650 8476 and Fax: +1 212 650 8585

**Running title:** Effects of parasite-derived vesicles on the *Drosophila* lymph gland

**Key words:** Extracellular vesicles, host-parasite, endocytosis, macrophages, apoptosis, *Drosophila*, parasitoid, wasp, phagocytosis, lymph gland, signaling

## 1 **Abstract**

2 The wasps *Leptopilina heterotoma* parasitize and ingest their *Drosophila* hosts. They  
3 produce extracellular vesicles (EVs) in the venom that are packed with proteins, some of  
4 which perform immune suppressive functions. EV interactions with blood cells of host  
5 larvae are linked to hematopoietic depletion, immune suppression, and parasite success.  
6 But how EVs disperse within the host, enter and kill hematopoietic cells are not well  
7 understood. Using an antibody marker for *L. heterotoma* EVs, we show that these  
8 parasite-derived structures are readily distributed within the hosts' hemolymphatic  
9 system. EVs converge around the tightly clustered cells of the posterior signaling center  
10 (PSC) of the larval lymph gland, a small hematopoietic organ in *Drosophila*. The PSC  
11 serves as a source of developmental signals in naïve animals. In wasp-infected animals,  
12 the PSC directs the differentiation of lymph gland progenitors into lamellocytes. These  
13 lamellocytes are needed to encapsulate the wasp egg and block parasite development.  
14 We found that *L. heterotoma* infection disassembles the PSC and PSC cells disperse into  
15 the disintegrating lymph gland lobes. Genetically manipulated PSC-less lymph glands  
16 remain non-responsive and largely intact in the face of *L. heterotoma* infection. We also  
17 show that the larval lymph gland progenitors use the endocytic machinery to internalize  
18 EVs. Once inside, *L. heterotoma* EVs damage the Rab7- and LAMP1-positive late  
19 endocytic and phagolysosomal compartments. Rab5 maintains hematopoietic and  
20 immune quiescence as *Rab5* knockdown results in hematopoietic over-proliferation and  
21 ectopic lamellocyte differentiation. Thus, both aspects of anti-parasite immunity, i.e., (a)  
22 phagocytosis of the wasp's immune-suppressive EVs, and (b) progenitor differentiation  
23 for wasp egg encapsulation reside in the lymph gland. These results help explain why the

24 lymph gland is specifically and precisely targeted for destruction. The parasite's  
25 simultaneous and multipronged approach to block cellular immunity not only eliminates  
26 blood cells, but also tactically blocks the genetic programming needed for supplementary  
27 hematopoietic differentiation necessary for host success. In addition to its known  
28 functions in hematopoiesis, our results highlight a previously unrecognized phagocytic  
29 role of the lymph gland in cellular immunity. EV-mediated virulence strategies described  
30 for *L. heterotoma* are likely to be shared by other parasitoid wasps; their understanding  
31 can improve the design and development of novel therapeutics and biopesticides as well  
32 as help protect biodiversity.

33

## 34 **Author summary**

35 Parasitoid wasps serve as biological control agents of agricultural insect pests and are  
36 worthy of study. Many parasitic wasps develop inside their hosts to emerge as free-  
37 living adults. To overcome the resistance of their hosts, parasitic wasps use varied and  
38 ingenious strategies such as mimicry, evasion, bioactive venom, virus-like particles,  
39 viruses, and extracellular vesicles (EVs). We describe the effects of a unique class of  
40 EVs containing virulence proteins and produced in the venom of wasps that parasitize  
41 fruit flies of *Drosophila* species. EVs from *Leptopilina heterotoma* are widely distributed  
42 throughout the *Drosophila* hosts' circulatory system after infection. They enter and kill  
43 macrophages by destroying the very same subcellular machinery that facilitates their  
44 uptake. An important protein in this process, Rab5, is needed to maintain the identity of  
45 the macrophage; when Rab5 function is reduced, macrophages turn into a different cell  
46 type called lamellocytes. Activities in the EVs can eliminate lamellocytes as well. EVs  
47 also interfere with the hosts' genetic program that promotes lamellocyte differentiation  
48 needed to block parasite development. Thus, wasps combine specific preemptive and  
49 reactive strategies to deplete their hosts of the very cells that would otherwise sequester  
50 and kill them. These findings have applied value in agricultural pest control and medical  
51 therapeutics.

## 52 **Introduction**

53 Parasitoid (parasitic) wasps have an obligatory relationship with their insect hosts.  
54 Engaged in a biological “arms race,” each partner continuously adapts to the other to  
55 emerge alive. For reproductive success, parasitic wasps target their hosts’ behavior,  
56 development and immune system. Their attack mechanisms range from biochemical  
57 warfare and mimicry, to passive evasion and active immune suppression [1-3]. *Drosophila*  
58 and their parasitic wasps are an emerging model for studying how wasps evade or  
59 suppress host defenses [4, 5]. The generalist *Leptopilina heterotoma* (*Lh*) succeeds on  
60 the *Drosophila* species within and beyond the melanogaster group. Its close relative, *L.*  
61 *boulardi* (*Lb*), considered a specialist, mainly infects flies of the melanogaster group. Both  
62 wasps are highly successful on *D. melanogaster*; they consume its developing larval and  
63 pupal stages to emerge as free-living adults [6].

64 Oviposition into second-to-early-third *D. melanogaster* larval hosts by *Lb* and *Lh* wasps  
65 yields divergent immunological effects. *Lb* infection activates many components of  
66 humoral and cellular immunity: Toll-NF- $\kappa$ B, JAK-STAT, and the melanization pathways  
67 and their target genes are transcriptionally upregulated; there is a burst of hematopoietic  
68 proliferation and differentiation of blood cells (also called hemocytes) in the lymph gland  
69 and in circulation. If the immune responses are strong and sustained, macrophages and  
70 lamellocytes encapsulate and kill wasp eggs [7-11]. *Lh* infection in contrast suppresses  
71 immune gene expression and kills immature and mature larval hemocytes [12, 13].

72 *Lb* and *Lh* females (and also *L. victoriae*, a sister species of *Lh*) produce discrete immune-  
73 suppressive extracellular vesicle- (EV) like structures in their venom glands (called multi-  
74 strategy extracellular vesicles, MSEVs in *Lh* and venosomes in *Lb*) [14, 15]. Previously

75 called virus like particles [16-18] these EVs lack clear viral features [15, 19]. They are  
76 produced in the venom gland, a structure made up of the long gland and a reservoir. The  
77 secretory cells of the long gland synthesize and secrete proteins some of which are  
78 initially incorporated into discrete non-spiked vesicle-like structures. In sister species *Lh*  
79 and *Lv*, these structures mature in the reservoir and assume a stellate morphology with  
80 4-8 spikes radiating from the center. Mature EVs are roughly 300 nm in diameter, [14, 16,  
81 20-22]. Packed with more than 150 proteins, EVs are, in part, responsible for divergent  
82 physiological outcomes in infected hosts [15, 19, 23].

83 Among the most abundant in the *Lh* EV proteins is a 40 kDa surface/spike protein (SSp40)  
84 [20]. SSp40 shares structural similarities with the IpaD/SipD family of proteins of the  
85 gastroenteric disease-causing Gram negative bacteria, *Shigella* and *Salmonella* [15].  
86 Similar to SSp40's localization to *Lh* EV spike tips, IpaD localizes to the tips of the T3  
87 secretion injectisome, a bacterial transfer system that injects virulence proteins into  
88 mammalian cells. IpaD itself promotes apoptosis of mammalian macrophages [24, 25].  
89 These parallels between *Lh* SSp40 and bacterial IpaD/SipD suggest that *Lh* EVs may  
90 share some similarities with bacterial secretion systems. Comparative  
91 transcriptomic/proteomic approaches revealed that SSp40 and a few other EV proteins  
92 are not expressed in the *Lb* venom [15].

93 Whereas *Lh* EVs lyse lamellocytes within a few hours of wasp attack, *Lb* EVs do not have  
94 the same effect [7, 16, 26]. Our immune-inhibition experiments suggested that *Lh*'s  
95 SSp40 mediates EV interactions with lamellocytes [20]. *Lh* infection also uniquely  
96 promotes apoptosis of larval macrophages and of lymph gland hemocytes [13].  
97 Macrophages make up more than 95% of all hematopoietic cells while differentiated

98 lamellocytes are rarely found in naïve hosts [8-10, 27]. Work in the field strongly suggests  
99 that the protein activities concentrated within the *Lh* EVs are responsible for the  
100 destruction of these mature and immature blood cells. However, how a macro-  
101 endoparasite targets the hematopoietic system and accesses its progenitor population  
102 has not been studied. The modes of *Lh* EV entry into these cells and the pathways of  
103 destruction are also not well understood.

104 The goal of this study was to obtain a macro-level view of *Lh* EV interactions with cells of  
105 the larval hemolymphatic system after infection. The term hemolymph refers to the  
106 interstitial fluid that distributes hormones, peptides and other macromolecules into organs  
107 through the pumping action of an unbranched tubular heart, or the dorsal vessel. Dozens  
108 of macrophages circulate in the hemolymph. The heart lumen is surrounded by a column  
109 of paired cardiomyocytes and associated pericardial cells. This tubular structure is held  
110 in place by alary muscles [28-30]. Hematopoietic cells are organized in paired cell clusters  
111 (or lobes) on the dorsal vessel. In third instar larvae, the anterior-most lobes have blood  
112 cells at various stages of differentiation; the least differentiated progenitors are confined  
113 adjacent to the dorsal vessel, whereas the developing macrophages are sequestered in  
114 the cortical regions of the lobes (Fig 1A). In naïve hosts, the progenitor state is maintained  
115 by a putative niche (also called the posterior signaling center, PSC). The PSC is a tight  
116 unit of about 25-50 cells and is positioned posteriorly to the progenitors [31, 32]. Upon *Lb*  
117 infection, the PSC reprograms hematopoiesis inducing macrophage and lamellocyte  
118 differentiation [30, 32-39]. The entire structure is covered by the acellular basement  
119 membrane [28, 40].

120 Using *Drosophila* genetics, cell-specific markers and SSp40 staining as a proxy for *Lh* EV  
121 localization, we have pieced together a broad view of this host-parasite interaction  
122 interface. We show an abundance of *Lh* EVs in (a) the lumen of the larval dorsal vessel,  
123 (b) along the collagen/perlecan-based basement membrane around the dorsal vessel and  
124 surrounding clusters of lymph gland progenitors, and (c) inside the progenitor and mature  
125 macrophages. Moreover, high EV signal correlates with the disassembly of the cohesive  
126 PSC unit. PSC ablation limits EV internalization and loss of lymph gland hemocytes, while  
127 PSC inactivation via *hedgehog* (*hh*) knockdown (KD) does not have this effect. We also  
128 show that lymph gland hemocytes can phagocytose *Lh* EVs using the classical Rab5-  
129 mediated retrograde transport (RGT) pathway. Surprisingly, Rab5 also maintains fly  
130 macrophage identity, as *Rab5* knockdown leads to over-proliferation, lamellocyte  
131 differentiation and tumorigenesis; *Rab5* function is cell-autonomous. Thus lymph glands  
132 are not merely a source of mature blood cells but are themselves immune competent  
133 organs and can clear the immune-suppressive *Lh* EVs to defend the host. However, *Lh*  
134 EVs proactively dislodge cells of the PSC, blocking differentiation of the protective  
135 immune cells. *Lh* EVs target the endomembrane system of macrophages that ultimately  
136 results in their apoptosis, thus highlighting central and previously unrecognized roles of  
137 the lymph gland in cellular immunity. These observations help explain why *Lh* infections  
138 target the larval lymph gland. The direct EV-macrophage interactions and cellular  
139 outcomes set the stage for future molecular analyses in both the hosts and parasites.

140



## 141 **Results**

### 142 ***Lh EVs are present within the larval lymphatic system***

143 *Lb17* attack triggers lamellocyte differentiation in the larval lymph gland cortex (Fig. 1A-  
144 C). At an equivalent time-point, *Lh*-infected lobes are significantly smaller (Fig. 1D-K);  
145 [13]. Surprisingly, unlike *Antp>mCD8GFP*-expressing PSCs of naive and *Lb*-infected  
146 lobes that remain tightly clustered (Fig. 1A-C), PSC cells of *Lh*-infected hosts are  
147 dislodged and some are distributed in the body of the lobe (Fig. 1D).

148 To understand these responses, we imaged more than 25 hosts in multiple experiments.  
149 Throughout these studies, we used a polyclonal antibody to mark SSp40, an *Lh* EV-  
150 specific protein [20]. *Lh* infection of *Pxn>GFP* animals reduced *Pxn>GFP* expression (Fig.  
151 1E-H). (*Pxn* is normally active in the cortex and its expression mimics that of many other  
152 genes downregulated by *Lh* infection [7]). An abundance of *Lh* EVs was observed in  
153 anterior- and posterior-lobe hemocytes as well as in the dorsal vessel (Fig. 1F-H, J, K).  
154 This staining signal is absent in glands from naive animals (Fig. 1E, I). Thus, *Lb* and *Lh*  
155 attack have drastically different outcomes and *Lh* EVs appear to interact directly with most  
156 lymph gland hemocytes.

157 In our analyses across multiple experiments, we found that the degree of tissue loss and  
158 EV distribution varies. Lobe morphologies ranged from nearly intact and filled with EVs  
159 (Fig. 1F, J) to damaged lobes and many or few EVs (Fig. 1G, H, K). This variation is likely  
160 due to (a) the duration of infection (i.e., time between oviposition and dissection); (b) the  
161 injected EV dose; or (c) the dynamics of EV circulation. Dissections at later time points  
162 showed loss of almost all lymph gland hemocytes [13].

163 To then probe how *Lh* EVs enter the lymphatic system, we stained *Lh*-infected glands  
164 from fly strains with GFP-tagged Collagen IV (basement membrane, *Viking* [41]) or GFP-  
165 tagged proteoglycan core protein, Perlecan/Trol [42]. In both cases, EV puncta were  
166 clearly localized with the continuous GFP signals of these extracellular matrix (ECM)  
167 proteins along the dorsal vessel as well as in the interstitial spaces around clustered  
168 hematopoietic progenitors (yellow puncta in Fig. 2A-D' arrows). Surprisingly, punctate  
169 staining was also seen inside immature progenitors, adjacent to the dorsal vessel (Fig.  
170 2B, B' D, D'). EVs were also observed inside some cardiomyocytes as evidenced by  
171 SSp40 colocalization with the mCD8GFP signal in *HandΔ>mCD8GFP* larvae (Fig. 2E-F',  
172 arrows). Thus, *Lh* EVs associate with ECM proteins of the lymphatic system, enter the  
173 dorsal vessel lumen and even some cardiomyocytes.

174

### 175 ***Effects of Lh infection on PSC integrity***

176 Previous studies have demonstrated that upon *Lb* infection, the PSC reprograms  
177 hematopoietic development and promotes lamellocyte differentiation. Similar to controls,  
178 *Lb* infected PSCs remain tightly clustered [35, 37, 38, 43, 44]. We found that regardless  
179 of the *Lh* strain, PSC cells dislodged from their normal posterior position into the body of  
180 the lobe (Fig. 1D and Fig. S1A, B). At the time points we examined, half of the PSC cells  
181 relocated into the lobe, of which an overwhelming majority (>95%) were present as single  
182 cells or as groups of two cells. The other half remained in their original place, although  
183 some were not as tightly clustered (Fig. 1D; Fig. S1; n=24 PSCs from 12 lymph glands).  
184 As expected, in 14 lobes from naive controls, all PSC cells were tightly packed. Strikingly,

185 in samples where the PSCs were still intact, EVs congregated in regions adjacent to the  
186 PSC, but were never found inside the PSC cells (Fig. S1A, B).

187 The Slit ligand, originating from adjacent cardiomyocytes, controls PSC integrity via the  
188 Robo receptors in the PSC; Robo2 has the strongest effect [45]. Indeed, the effect of *Lh*  
189 infection on the PSC resembles Slit/Robo2 knockdown, which promotes PSC  
190 disassembly [45] (Fig. 1 and Fig. S1). A cohesive PSC is important in hematopoietic  
191 development as fewer macrophages and crystal cells develop in *Slit/Robo2* KD lobes  
192 compared to controls. But differing from *Lh* infection, *Slit* KD PSCs are larger and there  
193 is no apparent loss of progenitors [45]. In spite of different outcomes in the two conditions,  
194 we hypothesized that the initial steps might be shared and that *Lh* EVs might inactivate  
195 the Slit-Robo signal, which might explain PSC disassembly.

196 To test this idea, we infected animals in which the Slit-Robo pathway was manipulated to  
197 promote constitutive signaling. We found that neither expressing active Slit nor  
198 overexpressing Robo2 altered *Lh* EVs' ability to disassemble the PSC. *Lh* infection of  
199 *HandΔ>Slit-N* animals still promoted PSC disassembly (Fig. S2A-C'; n =16 lobes) even  
200 though gain-of-function *Slit-N* [46] reverses the effects of Slit KD [45]. Similarly, *Lh*  
201 infection bypassed the effects of Robo2 overexpression (*Antp>Robo2-HA*) and promoted  
202 PSC disassembly (Fig. S2D-F'). Many EVs are observed around these PSCs (Fig. S3;  
203 n=16). Thus, either EVs inactivate PSC function independently of the Slit-Robo signal, or  
204 they possess redundant mechanisms that disable constitutive Slit-Robo signaling.

205

206 ***PSC-less lymph glands remain intact***

207 PSC-less lymph glands were unable to induce lamellocyte differentiation after *Lb* infection  
208 [36]. We asked if ablating the PSC might similarly inhibit the *Lh* infection responses. PSC-  
209 less lobes (*Col>Hid*) lacked *Antp* staining and *Lh14* infection did not affect lobe integrity  
210 (Fig. S4A-D'; n>12 lobes). Moreover, while *Lh*-infected *UAS-Hid* lobes lost progenitors  
211 and exhibited high levels of EV uptake (Fig. 3A, B, D, E), *Lh*-infected PSC-less lobes  
212 remained intact and showed low, a non-specific SSp40 staining signal in anterior and  
213 posterior lobes (Fig. 3C, F; n>12 lobes for each condition). In contrast to the non-  
214 responsive *Col>Hid* lobes, *Antp>hh<sup>RNAi</sup>* lobes responded to *Lh* infection and suffered  
215 progenitor cell loss (Fig. S5A-F; n>12 lobes for each condition). Thus, inactivating the  
216 signaling function of the PSC does not appear to affect the wasp's ability to disassemble  
217 the PSC. P1 staining revealed that *Lh* infection does not block macrophage differentiation  
218 (Fig. S5C). Taken together, these results suggest that the PSC plays a structural role in  
219 trafficking of EVs from either the hemolymph or the dorsal vessel into the lobes and that  
220 the cell-lethal effects of *Lh* EVs is distinct or downstream of the PSC's niche function.

221

222 ***The larval lymph gland is phagocytically competent***

223 We next studied if EV uptake into hematopoietic cells occurs via RGT mechanisms. In  
224 *Pxn>GFP*; *+Bc* heterozygous lymph glands, we observed blackened, dead crystal cells  
225 in the cytoplasm of the GFP-positive cortical cells (Fig. S6). This observation suggests  
226 that GFP-positive lymph gland cells are phagocytically competent. We therefore  
227 investigated if *Lh* EV uptake depends on Rab5, an early endosomal protein. Rab5  
228 mediates trafficking from the plasma membrane to early endosomes [47]. In contrast to

229 *Pxn>GFP* macrophages, where EV staining is bright and punctate throughout the  
230 cytoplasm (Fig. 4A, B), *Pxn>GFP, Rab5<sup>RNAi</sup>* cells show peripheral punctate staining,  
231 presumably from intact EVs, trapped in early endosomes, both in lymph gland (Fig. 4C;  
232 arrows) and circulating (Fig. 4D; arrows) hemocytes. In lamellocytes, the EV signal is  
233 diffuse and nuclear, and Rab5 KD shows no change in staining intensity or distribution  
234 (Fig. 4E, F; arrowheads), suggesting Rab5-independent uptake mechanisms are  
235 involved. *msn-GFP*-and Integrin- $\beta$ -positive lamellocyte fragments were also observed in  
236 *Lh*-infected macrophages suggesting occurrence of efferocytosis (Fig. S7).

237

### 238 ***Lh* EVs negatively impact phagolysosomal organization in macrophages**

239 Rab7 mediates late endosome formation and trafficking between late endosomes and  
240 lysosomes, marked by Rab7 and LAMP1, respectively [47]. To evaluate if *Lh* EVs impact  
241 the RGT machinery, infected glands expressing GFP-tagged Rab5, Rab7, or LAMP1  
242 proteins were examined (Fig. 5). Under our experimental conditions, *Lh* EVs rarely  
243 colocalized with early endosomes and Rab5 compartment morphology remained  
244 comparable to uninfected controls (only 14% of SSp40 puncta are Rab5-positive; n = 221  
245 cells; 6 lobes; Fig. 5A-C). In contrast, *Lh* EVs were consistently found with GFP-Rab7  
246 and GFP-LAMP1 and these compartments were grossly distorted (100% co-localization;  
247 n = 115 and 112, Rab7 and LAMP, respectively, 6 lobes each; Fig. 5D-E"). Moreover, the  
248 Rab7/EV and LAMP1/EV signals were asymmetrically localized in *Lh*-affected cells.  
249 These observations suggest that high numbers of *Lh* EVs transit through early  
250 endosomes, but that they are retained in late RGT compartments including lysosomes.

251 Thus, *Lh* EVs have a detrimental effect on RGT compartment integrity and this loss of  
252 integrity may promote lysosomal leakage and labilization.

253

### 254 ***Rab5 suppresses proliferation and maintains the macrophage fate***

255 We were surprised to find that *Pxn>GFP Rab5<sup>RNAi</sup>* animals developed melanized tumors  
256 (Fig. S8A, B); the hematopoietic population is significantly expanded and lamellocyte  
257 differentiation is robust, affecting viability (Fig. S8C-F). (Variability in viability and tumor  
258 development in *Rab5* KD animals is likely due to the strength and differential cell-specific  
259 expression patterns of the GAL4 drivers.) A similar result was observed with the  
260 expression of the dominant negative *Rab5S34N* protein which cannot bind GTP [48].  
261 *Rab5* KD even in the lymph gland medullary zone (*TepIV>Rab5<sup>RNAi</sup>*) resulted in  
262 lamellocyte differentiation (Fig. 6A, B).

263 Hematopoietic expansion correlated with increased mitotic index (MI) in lobes of tumor-  
264 bearing *Pxn>GFP Rab5<sup>RNAi</sup>* animals (Fig. 6C, D) suggesting that normal *Rab5* function  
265 checks over-proliferation and ectopic progenitor differentiation. (MI=2.2 ± 2.15 in control  
266 *Pxn>GFP*; 2.9 ± 1.1, and 5.5 ± 1.9 in experimental *Pxn>GFP, Rab5<sup>RNAi</sup>* animals without  
267 and with tumors, respectively (n = 10 for each condition). These results suggest that *Rab5*  
268 acts as a tumor suppressor and maintains hematopoietic immune quiescence.

269 Control “FLP-out” clones without *Rab5<sup>RNAi</sup>* contained small cells that did not express  
270 integrin-β; experimental clones with *Rab5<sup>RNAi</sup>* had larger, F-actin-rich cells with a typical  
271 lamellocyte morphology, that were also integrin-β-positive (Fig. 6E-H). These results  
272 suggest that *Rab5*'s requirement in maintaining the progenitor or macrophage fate is cell-  
273 autonomous.

## 274 **Discussion**

### 275 **System-wide distribution but specific effects of *Lh* EVs**

276 Parasitism by *L. heterotoma* has been of interest because of its ability to parasitize many  
277 *Drosophila* hosts and the existence of venom factors that kill host hemocytes. The  
278 discovery of an anti-lamellocyte activity intrinsic to *Lh* EVs provided initial insights into the  
279 critical roles of these EVs in parasitism [20, 49]. However, details underlying their  
280 apoptotic effects on macrophages have been lacking. This work provides the first view  
281 into how *Lh* EVs rely on the host's circulation to gain system-wide distribution to not only  
282 precisely kill the available effector cells but also to pre-emptively interfere with the host's  
283 ability to produce additional effector cells. We show that lymph glands serve an important,  
284 previously unappreciated role in immunity. A majority of lymph gland cells can  
285 phagocytose *Lh* EVs to protect the host from their detrimental effects. EV activities in turn  
286 promote their apoptotic death by disrupting their endomembrane system.

287 This work also lays bare new questions. *Lh* EVs' association with the ECM proteins  
288 around the lymphatic system cells suggests ways in which EVs might recognize and  
289 home into the lymph gland hemocytes and cardiomyocytes although the role of the ECM,  
290 the details of their entry and physiological effects on cardiomyocytes are currently  
291 unclear. As has been suggested for Slit-carrying vesicles [45], cardiac cells might provide  
292 a route for *Lh* EVs to converge into the vicinity of the PSCs. Once inside lymph gland  
293 hemocytes, they simultaneously target the protective functions of macrophages and  
294 lamellocytes and their activities culminate to strongly block encapsulation (Fig. 7). These  
295 strategies are not uncommon and are likely to be shared by closely related *Leptopilina*

296 wasps or even unrelated virulent wasps that attack drosophilid and non-drosophilid hosts  
297 and are known to destroy their hosts' hematopoietic cells [50-54].

### 298 ***Lh* EVs proactively block encapsulation**

299 Studies with *Lb* showed that the lymph gland itself responds to wasp infection and  
300 lamellocytes differentiate from hematopoietic progenitors [8, 9, 55, 56]. In addition to  
301 PSC's niche function in naïve animals [31, 32, 57-59], the PSC also appears to play an  
302 anti-parasite role as *Lb* infection promotes lamellocyte differentiation [30, 35-38, 43, 60].  
303 Given this latter role, it is reasonable to interpret *Lh*'s effects on PSC integrity as part of  
304 a corresponding adaptive strategy that *Lh* has acquired during its evolutionary history.

305 The high *Lh* EVs levels around the PSC and its disassembly provide novel physiological  
306 insights into PSC functions and raise intriguing mechanistic questions. A normally  
307 clustered and cohesive PSC organization is needed for proper hematopoietic  
308 differentiation in naïve animals [45]. Although *Lh* infection-induced PSC disassembly and  
309 hemocyte loss are observed together in fixed samples, our data from infected PSC-less  
310 animals suggest that PSC disruption might precede hemocyte death. It is possible that  
311 the PSC may somehow "recognize" foreign entities and might serve to protect the  
312 progenitor microenvironment by acting as a chemical or mechanical barrier between the  
313 vascular and hematopoietic cells. In this scenario, *Lh* EVs may be targeting PSC  
314 cohesiveness to inactivate this barrier function.

315 This interpretation is consistent with the recently discovered permeability barrier in the  
316 PSC that is breached by systemic bacterial infection. Permeability barrier in the PSC is  
317 maintained by septate junctions (SJ) and SJ depletion is linked to increased Toll signaling,  
318 cellular immune activation and improved host survival [39]. The barrier function between



319 the vascular and hematopoietic cells proposed here would serve to limit the ingress of  
320 structures such as microbes and EVs. The mechanisms underlying the effects of ablated  
321 PSCs are unclear but it is notable that PSC-less lobes do not respond to either *Lb* or *Lh*  
322 infections (our results and [61]). Examining whether *Lb* EVs/venosomes similarly interact  
323 with the lymph gland ECM, congregate around the PSC, and are phagocytosed by  
324 hemocytes will shed more light on these processes.

325 Extracellular vesicles secreted from mammalian neutrophils and endothelial cells can  
326 direct cell motility and chemotaxis [62, 63]. Thus it is possible that one or more *Lh* EV  
327 activities [15] is similarly responsible for PSC disassembly. These activities may perturb  
328 host pathways required for normal PSC cohesion and function, although manipulating the  
329 Slit-Robo pathway components, or *hh* signaling, hypothesized to disrupt the infection  
330 process, was insufficient to block *Lh*'s ability to disperse the PSC and attack hemocytes.  
331 *Lh* EVs may possess redundant or independent mechanisms to control PSC integrity and  
332 this question remains open for further research.

### 333 **A central role for phagocytosis in the anti-parasite response**

334 The ability of macrophages to ingest and kill microbes is a fundamental facet of innate  
335 immunity. Microbes have evolved to evade or escape the destructive conditions in their  
336 host cells' phagolysosomes. While most intracellular pathogens avoid fusion with  
337 lysosomes, others modify endocytic trafficking differently to survive in their host cells [64].  
338 We have shown that like microbes, *Lh* EVs are endocytosed and can damage the late  
339 endocytic compartments. This suggests that their biochemical activities may distort and  
340 damage intracellular membranes although how this occurs is unclear. A novel family of  
341 *Lh* EV-associated GTPases [15] are possible candidates for such activities as expression

342 of select GTPases in yeast alter vacuolar morphologies [65]. Microbial infection of  
343 macrophages can activate apoptosis responses [66-68] and it is possible that similar  
344 effects of *Lh* EVs in fly macrophages are directly linked to their apoptosis.

345 Lamellocytes utilize a flotillin/lipid raft dependent mechanism to internalize *Lb* EVs [69],  
346 and it is possible that *Lh* EVs use the same or a similar pathway. The significance of the  
347 nuclear SSp40 signal in lamellocytes after *Lh* infection is unclear; but because the signal  
348 is not punctate, *Lh* EVs are likely internalized via a membrane fusion step in which their  
349 vesicular character is lost. EM results also show that unlike macrophages with  
350 membrane-enclosed endocytic vesicles containing intact *Lh* EVs, lamellocytes do not  
351 have such compartments, and once internalized, EVs lose structural integrity [49].  
352 Efferocytosis thus appears to be an effector anti-parasite response as lysed lamellocytes  
353 are cleared by this process, and it may ultimately also be beneficial to parasite  
354 development.

355 Our genetic studies with Rab5 highlight the central role of the endocytic processes in the  
356 anti-parasite response. Loss of endocytic trafficking activates immune signaling ([70-72]).  
357 From a physiological standpoint, it makes sense why the lymph gland is a dedicated target  
358 of wasp infections. Both key aspects of anti-wasp cellular immunity, i.e., phagocytosis of  
359 the wasp's EVs and lamellocyte differentiation, unequivocally reside in the lymph gland.  
360 These ideas can be further examined at the molecular level with the available descriptions  
361 of the *Lh* and *Lb* EV proteomes [15, 19, 23]. Virulence factors provide the armament for  
362 parasite success in the host/pathogen arms race. Insights from this model host-parasite  
363 system can influence our understanding of how parasite-derived factors have shaped the  
364 immune physiology of fly hosts.

365 **Author contributions**

366 All authors conceived the experiments, JR, MEH and ZR performed experiments; SG  
367 supervised the project and wrote the manuscript with input from coauthors.

368

369 **Competing interests**

370 The authors declare no competing interests.

371

372 **Acknowledgements**

373 We are grateful to the Bloomington Drosophila Stock Center, Developmental Studies  
374 Hybridoma Bank, and colleagues for provision of fly stocks and antibodies. Funding for  
375 this work came from NASA (NNX15AB42G), National Science Foundation (1121817 and  
376 2022235), National Institutes of Health (1F31GM111052-01A1 to MEH and  
377 G12MD007603-30 to CCNY) and Howard and Vicki Palefsky Fellowship to JR. The  
378 sponsors or funders did not play any role in the study design, data collection and analysis,  
379 decision to publish, or preparation of the manuscript.

380

## 381 **Materials and Methods**

### 382 **Stocks and crosses**

383 All *D. melanogaster* stocks were raised on standard fly medium containing cornmeal flour,  
384 sucrose, yeast, and agar at 25°C.

385 GAL4 lines: PSC drivers were: *Antp-GAL4*; *mCD8GFP* ([73], from S. Minakhina) and *y w*;  
386 *Collier-Gal4/CyO y<sup>+</sup>* ([32] from M. Crozatier). The truncated *HandΔ* promoter is active in  
387 cardiomyocytes of the dorsal vessel ([74], from M. Crozatier). Hemocyte drivers were:  
388 *Pxn-GAL4*, *UAS-GFP* ([75], from U. Banerjee); *Hemese-GAL4 (He-GAL4)* ([76], from D.  
389 Hultmark); *eater (ea)-GAL4* ([77], from R.A. Schulz); *Collagen-GAL4 (Cg>GFP)* ([78],  
390 from C. Dearolf); *Serpent (Srp)-GAL4* [79] and *TepIV-GAL4* [80] (both from N. Fossett);  
391 *Hemolectin-GAL4 (Hml>GFP)* ([81], from J-M. Reichhart).

392 UAS lines: *UAS-Slit-N* ([46]; Slit gain-of-function) and *UAS-Robo2-HA* (for  
393 overexpression of Robo2, [82]) lines were obtained from T. Volk and T. Kidd.

394 Strains from the Bloomington Drosophila Stock Center: *UAS-Rab5<sup>RNAi</sup>* (#30518); *UAS-*  
395 *GFP-Rab5* (#43336) [83]; *UAS-GFP-Rab7* (#42706); *UAS-Rab5.S43N* (#42704); *UAS-*  
396 *GFP-LAMP*; *nSyb-GAL4/CyO:TM6B* (#42714) [84], and *UAS-hh<sup>RNAi</sup>* (#25794) [85]).

397 Other lines: A homozygous *Bc* stock devoid of markers and other mutations (from B.  
398 Lemaitre [86]) was balanced with the *CyO-GFP* balancer for crosses with the  
399 homozygous *Pxn-GAL4*, *UAS-GFP* strain. Protein trap lines were: *Collagen IV* (Viking)  
400 and *perlecan* (Trol) (from A. Spradling and L. Cooley); *hhf4f-GFP*; *Antp-GAL4/TM6 Tb Hu*  
401 (marks PSC, from R.A. Schulz); *Dome-MESO-GFP* (lymph gland medulla is GFP-  
402 positive) ([87] from M. Crozatier). We recombined this latter insertion with the *Antp-GAL4*

403 insertion to make a *UAS-mCD8GFP; Antp-GAL4, Dome-MESO-GFP (AntpDMG)* stock.  
404 *hop<sup>Tum-I</sup>, msn-GAL4; UAS-mCD8GFP* [88] uses the *misshapen (msn)* driver to mark  
405 lamellocytes [89]. For PSC-less animals, *UAS-Hid* [90] females were crossed with *Collier-*  
406 *GAL4/CyO y+* males. For FLP-out clones [91], *hsp70-flp; Actin>CD2>GAL4* flies were  
407 crossed with the *Rab5<sup>RNAi</sup>* flies; progeny was heat shocked at 37°C as described [38].  
408 UAS-GAL4 crosses were maintained at 27°C.

### 409 ***Wasp infections***

410 *y w* flies were used to rear wasps. Unless specified otherwise, infections were done with  
411 either *Lb17* or *Lh14* [7]. *LhNY* [20] was used to validate results with the *Lh14* strain. Ten  
412 to twelve trained female wasps were introduced to hosts from a 12-hr egg-lay. Hosts were  
413 allowed to recover after an 8-12 hr infection. Dissections were typically done two days  
414 after infection. Uninfected controls followed the same timeline. In general, longer infection  
415 regimes led to stronger responses: more lamellocytes differentiated after *Lb* infection and  
416 more lobe cells were lost after *Lh* infection. Under our experimental conditions,  
417 superparasitism by either wasp was rare and for our analyses, we avoided hosts with  
418 more than one parasite.

### 419 ***Immunohistochemistry***

420 Antibody staining was performed according to [92]. Primary mouse anti-SSp40 (1:1000)  
421 [20] and Cy3 AffiniPure donkey anti-mouse secondary (1:200) (Jackson Immuno  
422 Research) were used to detect *Lh* EVs. Mouse anti-Antennapedia (1:10; Developmental  
423 Studies Hybridoma Bank 8C11, [93] and macrophage-specific mouse anti-P1 (1:20; I.  
424 Ando [94]) were similarly detected. Nuclear dye (Hoechst 33258, Invitrogen, 1:500) and  
425 Rhodamine or Alexa Fluor 488-tagged Phalloidin (Invitrogen) were used for

426 counterstaining cells. For mitotic index, rabbit anti-phospho-histone3 (PH3; 1:200  
427 Molecular Probes)-positive hemocytes were scored in randomly selected 1000  $\mu\text{m}^2$  areas  
428 of imaged lobes.

429 Samples were mounted in VectaShield (Vector Laboratories). Lamellocytes were  
430 visualized by (a) high Phalloidin staining signal, (b) integrin- $\beta$  (1:200, Developmental  
431 Studies Hybridoma Bank CF.6G11 [95]) expression, or (c) *msnf9-GFP* expression [89].  
432 Representative results from twelve or more dissections from at least three independent  
433 experiments are presented, unless specified otherwise.

#### 434 ***Confocal imaging***

435 Mounted samples were imaged with Zeiss laser scanning confocal microscopes LSM 510  
436 or LSM710. For each experiment, images were scanned on the same microscope with  
437 the same software and scan settings. Images were gathered at 0.8  $\mu\text{m}$  -1.5  $\mu\text{m}$  and  
438 recorded at 8 bit. Laser amplifier gain and offset values were set with negative controls  
439 lacking either primary antibodies or wasp infection. Images were processed with Zeiss  
440 LSM image browser or Zen Lite 2012. Figures were assembled in Adobe Photoshop  
441 v12.0.4 and CC 2015.5 or Illustrator CC 2015.3.

442

#### 443 Literature cited

- 444 1. Libersat F, Delago A, Gal R. Manipulation of host behavior by parasitic insects and insect  
445 parasites. *Annu Rev Entomol.* 2009;54:189-207. Epub 2008/12/11. doi:  
446 10.1146/annurev.ento.54.110807.090556. PubMed PMID: 19067631.
- 447 2. Pennacchio F, Strand, M.R. Evolution of developmental strategies in parasitic Hymenoptera.  
448 *Annu Rev Entomol.* 2006;51:233-58.
- 449 3. Poirie M, Carton Y, Dubuffet A. Virulence strategies in parasitoid Hymenoptera as an example of  
450 adaptive diversity. *C R Biol.* 2009;332(2-3):311-20. Epub 2009/03/14. doi: 10.1016/j.crv.2008.09.004.  
451 PubMed PMID: 19281961.
- 452 4. Keebaugh ES, Schlenke TA. Insights from natural host-parasite interactions: the *Drosophila*  
453 model. *Dev Comp Immunol.* 2014;42(1):111-23. Epub 2013/06/15. doi: 10.1016/j.dci.2013.06.001.  
454 PubMed PMID: 23764256; PubMed Central PMCID: PMC3808516.
- 455 5. Heavner ME, Hudgins AD, Rajwani R, Morales J, Govind S. Harnessing the natural -parasitoid  
456 model for integrating insect immunity with functional venomics. *Curr Opin Insect Sci.* 2014;6:61-7. Epub  
457 2015/02/03. doi: 10.1016/j.cois.2014.09.016. PubMed PMID: 25642411; PubMed Central PMCID:  
458 PMC4309977.
- 459 6. Small C, Paddibhatla I, Rajwani R, Govind S. An introduction to parasitic wasps of *Drosophila* and  
460 the antiparasite immune response. *J Vis Exp.* 2012;(63):e3347. Epub 2012/05/17. doi: 3347 [pii]  
461 10.3791/3347. PubMed PMID: 22588641.
- 462 7. Schlenke TA, Morales J, Govind S, Clark AG. Contrasting infection strategies in generalist and  
463 specialist wasp parasitoids of *Drosophila melanogaster*. *PLoS Pathog.* 2007;3(10):1486-501. Epub  
464 2007/10/31. doi: 06-PLPA-RA-0488 [pii]  
465 10.1371/journal.ppat.0030158. PubMed PMID: 17967061; PubMed Central PMCID: PMC2042021.
- 466 8. Sorrentino RP, Carton Y, Govind S. Cellular immune response to parasite infection in the  
467 *Drosophila* lymph gland is developmentally regulated. *Dev Biol.* 2002;243(1):65-80. Epub 2002/02/16.  
468 doi: 10.1006/dbio.2001.0542  
469 S0012160601905421 [pii]. PubMed PMID: 11846478.
- 470 9. Lanot R, Zachary D, Holder F, Meister M. Postembryonic hematopoiesis in *Drosophila*. *Dev Biol.*  
471 2001;230(2):243-57. Epub 2001/02/13. doi: 10.1006/dbio.2000.0123  
472 S0012-1606(00)90123-4 [pii]. PubMed PMID: 11161576.
- 473 10. Anderl I, Vesala L, Ihalainen TO, Vanha-aho L-M, Andó I, Rämét M, et al. Transdifferentiation and  
474 proliferation in two distinct hemocyte lineages in *drosophila melanogaster* larvae after wasp infection.  
475 *PLoS Pathog.* 2016;12(7):e1005746. doi: 10.1371/journal.ppat.1005746. PubMed PMID: PMC4945071.
- 476 11. Huang J, Chen J, Fang G, Pang L, Zhou S, Zhou Y, et al. Two novel venom proteins underlie  
477 divergent parasitic strategies between a generalist and a specialist parasite. *Nat Commun.*  
478 2021;12(1):234. Epub 2021/01/13. doi: 10.1038/s41467-020-20332-8. PubMed PMID: 33431897;  
479 PubMed Central PMCID: PMC7801585.
- 480 12. Rizki TM, Rizki, R.M., Carton, Y. *Leptopilina heterotoma* and *L. boulardi*: strategies to avoid  
481 cellular defense responses of *Drosophila melanogaster*. *Exp Parasitol.* 1990;70:466-75.
- 482 13. Chiu H, Govind S. Natural infection of *D. melanogaster* by virulent parasitic wasps induces  
483 apoptotic depletion of hematopoietic precursors. *Cell Death Differ.* 2002;9(12):1379-81. Epub  
484 2002/12/13. doi: 10.1038/sj.cdd.4401134. PubMed PMID: 12478476.

- 485 14. Wan B, Goguet E, Ravallec M, Pierre O, Lemauf S, Volkoff AN, et al. Venom Atypical Extracellular  
486 Vesicles as Interspecies Vehicles of Virulence Factors Involved in Host Specificity: The Case of a  
487 *Drosophila* Parasitoid Wasp. *Front Immunol.* 2019;10:1688. Epub 2019/08/06. doi:  
488 10.3389/fimmu.2019.01688. PubMed PMID: 31379874; PubMed Central PMCID: PMC6653201.
- 489 15. Heavner ME, Ramroop J, Gueguen G, Ramrattan G, Dolios G, Scarpati M, et al. Novel Organelles  
490 with Elements of Bacterial and Eukaryotic Secretion Systems Weaponize Parasites of *Drosophila*. *Curr*  
491 *Biol.* 2017;27(18):2869-77 e6. Epub 2017/09/12. doi: 10.1016/j.cub.2017.08.019. PubMed PMID:  
492 28889977; PubMed Central PMCID: PMC65659752.
- 493 16. Rizki RM, Rizki TM. Parasitoid virus-like particles destroy *Drosophila* cellular immunity. *Proc Natl*  
494 *Acad Sci U S A.* 1990;87(21):8388-92. Epub 1990/11/01. PubMed PMID: 2122461; PubMed Central  
495 PMCID: PMC54961.
- 496 17. Dupas S, Brehelin M, Frey F, Carton Y. Immune suppressive virus-like particles in a *Drosophila*  
497 parasitoid: significance of their intraspecific morphological variations. *Parasitology.* 1996;113 ( Pt 3):207-  
498 12. Epub 1996/09/01. PubMed PMID: 8811846.
- 499 18. Morales J, Chiu H, Oo T, Plaza R, Hoskins S, Govind S. Biogenesis, structure, and immune-  
500 suppressive effects of virus-like particles of a *Drosophila* parasitoid, *Leptopilina victorinae*. *J Insect*  
501 *Physiol.* 2005;51(2):181-95. Epub 2005/03/08. doi: S0022-1910(04)00189-1 [pii]  
502 10.1016/j.jinsphys.2004.11.002. PubMed PMID: 15749103.
- 503 19. Di Giovanni D, Lepetit D, Guinet B, Bennetot B, Boulesteix M, Coute Y, et al. A Behavior-  
504 Manipulating Virus Relative as a Source of Adaptive Genes for *Drosophila* Parasitoids. *Mol Biol Evol.*  
505 2020;37(10):2791-807. Epub 2020/02/23. doi: 10.1093/molbev/msaa030. PubMed PMID: 32080746.
- 506 20. Chiu H, Morales J, Govind S. Identification and immuno-electron microscopy localization of p40,  
507 a protein component of immunosuppressive virus-like particles from *Leptopilina heterotoma*, a virulent  
508 parasitoid wasp of *Drosophila*. *J Gen Virol.* 2006;87(Pt 2):461-70. Epub 2006/01/25. doi: 87/2/461 [pii]  
509 10.1099/vir.0.81474-0. PubMed PMID: 16432035; PubMed Central PMCID: PMC2705942.
- 510 21. Gueguen G, Rajwani R, Paddibhatla I, Morales J, Govind S. VLPs of *Leptopilina boulardi* share  
511 biogenesis and overall stellate morphology with VLPs of the heterotoma clade. *Virus Res.* 2011;160(1-  
512 2):159-65. Epub 2011/06/28. doi: S0168-1702(11)00228-0 [pii]  
513 10.1016/j.virusres.2011.06.005. PubMed PMID: 21704090.
- 514 22. Ferrarese R, Morales J, Fimiari D, Webb BA, Govind S. A supracellular system of actin-lined  
515 canals controls biogenesis and release of virulence factors in parasitoid venom glands. *J Exp Biol.*  
516 2009;212(Pt 14):2261-8. Epub 2009/06/30. doi: 212/14/2261 [pii]  
517 10.1242/jeb.025718. PubMed PMID: 19561216; PubMed Central PMCID: PMC2702457.
- 518 23. Wey B, Heavner ME, Wittmeyer KT, Briese T, Hopper KR, Govind S. Immune Suppressive  
519 Extracellular Vesicle Proteins of *Leptopilina heterotoma* Are Encoded in the Wasp Genome. *G3*  
520 (Bethesda). 2020;10(1):1-12. Epub 2019/11/05. doi: 10.1534/g3.119.400349. PubMed PMID: 31676506;  
521 PubMed Central PMCID: PMC6945029.
- 522 24. Espina M, Olive AJ, Kenjale R, Moore DS, Ausar SF, Kaminski RW, et al. IpaD localizes to the tip of  
523 the type III secretion system needle of *Shigella flexneri*. *Infect Immun.* 2006;74(8):4391-400. Epub  
524 2006/07/25. doi: 74/8/4391 [pii]  
525 10.1128/IAI.00440-06. PubMed PMID: 16861624; PubMed Central PMCID: PMC1539624.
- 526 25. Arizmendi O, Picking W. D., and Picking W. L. Macrophage Apoptosis Triggered by IpaD from  
527 *Shigella flexneri*. *Infection and Immunity.* 2016;84(6):1857-65. doi: 10.1128/IAI.01483-15.



- 528 26. Colinet D, Schmitz, A., Cazes, D., Gatti, J.-L., Poirie, M. The origin of intraspecific variation of  
529 virulence in an eukaryotic immune suppressive parasite. *PLoS Pathog.* 2010;6:e1001206.
- 530 27. Stofanko M, Kwon, S.Y., Badenhorst, P. Lineage tracing of lamellocytes demonstrates *Drosophila*  
531 macrophage plasticity. *PLoS ONE.* 2010;5:e14051. doi: doi: 10.1371/journal.pone.0014051.
- 532 28. Rotstein B, Paululat A. On the Morphology of the *Drosophila* Heart. *J Cardiovasc Dev Dis.*  
533 2016;3(2). Epub 2016/04/12. doi: 10.3390/jcdd3020015. PubMed PMID: 29367564; PubMed Central  
534 PMCID: PMCPMC5715677.
- 535 29. Rizki T. The circulatory system and associated cells and tissues. In: Ashburner MaWT, editor. *The*  
536 *Genetics and Biology of Drosophila.* 2b. London: Academic Press; 1978. p. 397-452.
- 537 30. Banerjee U, Girard JR, Goins LM, Spratford CM. *Drosophila* as a Genetic Model for  
538 Hematopoiesis. *Genetics.* 2019;211(2):367-417. Epub 2019/02/09. doi: 10.1534/genetics.118.300223.  
539 PubMed PMID: 30733377; PubMed Central PMCID: PMCPMC6366919.
- 540 31. Mandal L, Martinez-Agosto JA, Evans CJ, Hartenstein V, Banerjee U. A Hedgehog- and  
541 Antennapedia-dependent niche maintains *Drosophila* haematopoietic precursors. *Nature.*  
542 2007;446(7133):320-4. Epub 2007/03/16. doi: nature05585 [pii]  
543 10.1038/nature05585. PubMed PMID: 17361183; PubMed Central PMCID: PMC2807630.
- 544 32. Krzemien J, Dubois L, Makki R, Meister M, Vincent A, Crozatier M. Control of blood cell  
545 homeostasis in *Drosophila* larvae by the posterior signalling centre. *Nature.* 2007;446(7133):325-8. Epub  
546 2007/03/16. doi: nature05650 [pii]  
547 10.1038/nature05650. PubMed PMID: 17361184.
- 548 33. Crozatier M, Glise B, Vincent A. Patterns in evolution: veins of the *Drosophila* wing. *Trends*  
549 *Genet.* 2004;20(10):498-505. Epub 2004/09/15. doi: 10.1016/j.tig.2004.07.013  
550 S0168-9525(04)00221-5 [pii]. PubMed PMID: 15363904.
- 551 34. Krzemien J, Crozatier M, Vincent A. Ontogeny of the *Drosophila* larval hematopoietic organ,  
552 hemocyte homeostasis and the dedicated cellular immune response to parasitism. *Int J Dev Biol.*  
553 2010;54(6-7):1117-25. Epub 2010/08/17. doi: 093053jk [pii]  
554 10.1387/ijdb.093053jk. PubMed PMID: 20711989.
- 555 35. Gueguen G, Kalamarz, M.E., Ramroop, J., Uribe, J., Govind, S. Polydnviral ankyrin proteins aid  
556 parasitic wasp survival by coordinate and selective inhibition of hematopoietic and immune NF-kappa B  
557 signaling in insect hosts. *PLoS Pathog.* 2013;9 (8):e1003580.
- 558 36. Benmimoun B, Polesello C, Haenlin M, Waltzer L. The EBF transcription factor Collier directly  
559 promotes *Drosophila* blood cell progenitor maintenance independently of the niche. *Proc Natl Acad Sci*  
560 *U S A.* 2015;112(29):9052-7. Epub 2015/07/08. doi: 1423967112 [pii]  
561 10.1073/pnas.1423967112. PubMed PMID: 26150488; PubMed Central PMCID: PMC4517242.
- 562 37. Sinenko SA, Shim J, Banerjee U. Oxidative stress in the haematopoietic niche regulates the  
563 cellular immune response in *Drosophila*. *EMBO Rep.* 2012;13(1):83-9. Epub 2011/12/03. doi:  
564 embor2011223 [pii]  
565 10.1038/embor.2011.223. PubMed PMID: 22134547; PubMed Central PMCID: PMC3246251.
- 566 38. Small C, Ramroop J, Otazo M, Huang LH, Saleque S, Govind S. An unexpected link between notch  
567 signaling and ROS in restricting the differentiation of hematopoietic progenitors in *Drosophila*. *Genetics.*  
568 2014;197(2):471-83. Epub 2013/12/10. doi: genetics.113.159210 [pii]  
569 10.1534/genetics.113.159210. PubMed PMID: 24318532; PubMed Central PMCID: PMC4063908.

- 570 39. Khadilkar RJ, Vogl W, Goodwin K, Tanentzapf G. Modulation of occluding junctions alters the  
571 hematopoietic niche to trigger immune activation. *Elife*. 2017;6. Epub 2017/08/26. doi:  
572 10.7554/eLife.28081. PubMed PMID: 28841136; PubMed Central PMCID: PMC5597334.
- 573 40. Grigorian M, Mandal L, Hartenstein V. Hematopoiesis at the onset of metamorphosis: terminal  
574 differentiation and dissociation of the *Drosophila* lymph gland. *Dev Genes Evol*. 2011;221(3):121-31.  
575 Epub 2011/04/22. doi: 10.1007/s00427-011-0364-6. PubMed PMID: 21509534.
- 576 41. Morin X, Daneman R, Zavortink M, Chia W. A protein trap strategy to detect GFP-tagged  
577 proteins expressed from their endogenous loci in *Drosophila*. *Proc Natl Acad Sci U S A*.  
578 2001;98(26):15050-5. Epub 2001/12/14. doi: 10.1073/pnas.261408198  
261408198 [pii]. PubMed PMID: 11742088; PubMed Central PMCID: PMC64981.
- 580 42. Kelso RJ, Buszczak M, Quinones AT, Castiblanco C, Mazzalupo S, Cooley L. Flytrap, a database  
581 documenting a GFP protein-trap insertion screen in *Drosophila melanogaster*. *Nucleic Acids Res*.  
582 2004;32(Database issue):D418-20. Epub 2003/12/19. doi: 10.1093/nar/gkh014. PubMed PMID:  
583 14681446; PubMed Central PMCID: PMC308749.
- 584 43. Crozatier M, Ubeda JM, Vincent A, Meister M. Cellular immune response to parasitization in  
585 *Drosophila* requires the EBF orthologue *collier*. *PLoS Biol*. 2004;2(8):E196. Epub 2004/08/18. doi:  
586 10.1371/journal.pbio.0020196. PubMed PMID: 15314643; PubMed Central PMCID: PMC509289.
- 587 44. Louradour I, Sharma A, Morin-Poulard I, Letourneau M, Vincent A, Crozatier M, et al. Reactive  
588 oxygen species-dependent Toll/NF-kappaB activation in the *Drosophila* hematopoietic niche confers  
589 resistance to wasp parasitism. *Elife*. 2017;6. Epub 2017/11/02. doi: 10.7554/eLife.25496. PubMed PMID:  
590 29091025; PubMed Central PMCID: PMC5681226.
- 591 45. Morin-Poulard I, Sharma A, Louradour I, Vanzo N, Vincent A, Crozatier M. Vascular control of the  
592 *Drosophila* haematopoietic microenvironment by Slit/Robo signalling. *Nat Commun*. 2016;7:11634.  
593 Epub 2016/05/20. doi: 10.1038/ncomms11634. PubMed PMID: 27193394; PubMed Central PMCID:  
594 PMC4874035.
- 595 46. Ordan E, Brankatschk M, Dickson B, Schnorrer F, Volk T. Slit cleavage is essential for producing  
596 an active, stable, non-diffusible short-range signal that guides muscle migration. *Development*.  
597 2015;142(8):1431-6. Epub 2015/03/31. doi: 10.1242/dev.119131. PubMed PMID: 25813540.
- 598 47. Bhuin T, Roy JK. Rab proteins: the key regulators of intracellular vesicle transport. *Exp Cell Res*.  
599 2014;328(1):1-19. Epub 2014/08/05. doi: S0014-4827(14)00318-8 [pii]  
10.1016/j.yexcr.2014.07.027. PubMed PMID: 25088255.
- 600 48. Zhang J, Schulze KL, Hiesinger PR, Suyama K, Wang S, Fish M, et al. Thirty-one flavors of  
601 *Drosophila* rab proteins. *Genetics*. 2007;176(2):1307-22. Epub 2007/04/06. doi:  
602 10.1534/genetics.106.066761. PubMed PMID: 17409086; PubMed Central PMCID: PMC1894592.
- 603 49. Rizki TM, Rizki RM. Parasitoid-induced cellular immune deficiency in *Drosophila*. *Ann N Y Acad*  
604 *Sci*. 1994;712:178-94. Epub 1994/04/15. PubMed PMID: 7910721.
- 605 50. Melk JP, Govind S. Developmental analysis of *Ganaspis xanthopoda*, a larval parasitoid of  
606 *Drosophila melanogaster*. *J Exp Biol*. 1999;202(Pt 14):1885-96. Epub 1999/06/23. PubMed PMID:  
607 10377270.
- 608 51. Chiu H, Sorrentino RP, Govind S. Suppression of the *Drosophila* cellular immune response by  
609 *Ganaspis xanthopoda*. *Adv Exp Med Biol*. 2001;484:161-7. Epub 2001/06/23. doi: 10.1007/978-1-4615-  
610 1291-2\_14. PubMed PMID: 11418981.
- 611 52. Suzuki M, Tanaka T. Virus-like particles in venom of *Meteorus pulchricornis* induce host  
612 hemocyte apoptosis. *J Insect Physiol*. 2006;52(6):602-13. Epub 2006/05/23. doi:  
613 10.1016/j.jinsphys.2006.02.009. PubMed PMID: 16712867.
- 614

- 615 53. Teramoto T, Tanaka T. Mechanism of reduction in the number of the circulating hemocytes in  
616 the *Pseudaletia separata* host parasitized by *Cotesia kariyai*. *J Insect Physiol.* 2004;50(12):1103-11. Epub  
617 2005/01/27. doi: 10.1016/j.jinsphys.2004.08.005. PubMed PMID: 15670857.
- 618 54. Wan NF, Ji XY, Zhang H, Yang JH, Jiang JX. Nucleopolyhedrovirus infection and/or parasitism by  
619 *Microplitis pallidipes* Szepilgeti affect hemocyte apoptosis of *Spodoptera exigua* (Hubner) larvae. *J*  
620 *Invertebr Pathol.* 2015;132:165-70. Epub 2015/10/17. doi: 10.1016/j.jip.2015.10.004. PubMed PMID:  
621 26470677.
- 622 55. Jung SH, Evans CJ, Uemura C, Banerjee U. The *Drosophila* lymph gland as a developmental  
623 model of hematopoiesis. *Development.* 2005;132(11):2521-33. Epub 2005/04/29. doi: dev.01837 [pii]  
624 10.1242/dev.01837. PubMed PMID: 15857916.
- 625 56. Kim-Jo C, Gatti JL, Poirie M. *Drosophila* Cellular Immunity Against Parasitoid Wasps: A Complex  
626 and Time-Dependent Process. *Front Physiol.* 2019;10:603. Epub 2019/06/04. doi:  
627 10.3389/fphys.2019.00603. PubMed PMID: 31156469; PubMed Central PMCID: PMC6529592.
- 628 57. Baldeosingh R, Gao H, Wu X, Fossett N. Hedgehog signaling from the Posterior Signaling Center  
629 maintains U-shaped expression and a prohemocyte population in *Drosophila*. *Dev Biol.* 2018;441(1):132-  
630 45. Epub 2018/07/04. doi: 10.1016/j.ydbio.2018.06.020. PubMed PMID: 29966604; PubMed Central  
631 PMCID: PMC6064674.
- 632 58. Tokusumi Y, Tokusumi T, Shoue DA, Schulz RA. Gene regulatory networks controlling  
633 hematopoietic progenitor niche cell production and differentiation in the *Drosophila* lymph gland. *PLoS*  
634 *One.* 2012;7(7):e41604. Epub 2012/08/23. doi: 10.1371/journal.pone.0041604  
635 PONE-D-12-16104 [pii]. PubMed PMID: 22911822; PubMed Central PMCID: PMC3404040.
- 636 59. Sinenko SA, Mandal L, Martinez-Agosto JA, Banerjee U. Dual role of wingless signaling in stem-  
637 like hematopoietic precursor maintenance in *Drosophila*. *Dev Cell.* 2009;16(5):756-63. Epub 2009/05/23.  
638 doi: S1534-5807(09)00093-8 [pii]  
639 10.1016/j.devcel.2009.03.003. PubMed PMID: 19460351; PubMed Central PMCID: PMC2718753.
- 640 60. Krzemien J, Oyallon J, Crozatier M, Vincent A. Hematopoietic progenitors and hemocyte lineages  
641 in the *Drosophila* lymph gland. *Dev Biol.* 2010;346(2):310-9. Epub 2010/08/17. doi: S0012-  
642 1606(10)00987-5 [pii]  
643 10.1016/j.ydbio.2010.08.003. PubMed PMID: 20707995.
- 644 61. Benmimoun B, Haenlin M, Waltzer L. Haematopoietic progenitor maintenance by EBF/Collier:  
645 beyond the Niche. *Cell Cycle.* 2015;14(22):3517-8. Epub 2015/12/15. doi:  
646 10.1080/15384101.2015.1093449. PubMed PMID: 26654595.
- 647 62. Sung BH, Weaver AM. Exosome secretion promotes chemotaxis of cancer cells. *Cell Adh Migr.*  
648 2017;11(2):187-95. Epub 2017/01/28. doi: 10.1080/19336918.2016.1273307. PubMed PMID: 28129015;  
649 PubMed Central PMCID: PMC5351719.
- 650 63. Majumdar R, Tavakoli Tameh A, Parent CA. Exosomes Mediate LTB4 Release during Neutrophil  
651 Chemotaxis. *PLoS Biol.* 2016;14(1):e1002336. Epub 2016/01/08. doi: 10.1371/journal.pbio.1002336.  
652 PubMed PMID: 26741884; PubMed Central PMCID: PMC4704783.
- 653 64. Case EDR, Samuel JE. Contrasting Lifestyles Within the Host Cell. *Microbiol Spectr.* 2016;4(1).  
654 Epub 2016/03/22. doi: 10.1128/microbiolspec.VMBF-0014-2015. PubMed PMID: 26999394; PubMed  
655 Central PMCID: PMC4804636.
- 656 65. Heavner M. Evidence for organelle-like extracellular vesicles from a parasite of *Drosophila* and  
657 their function in suppressing host immunity. [https://academicworks.cuny.edu/gc\\_etds/2585](https://academicworks.cuny.edu/gc_etds/2585). 2018.
- 658 66. Zhang Y, Bliska JB. Role of macrophage apoptosis in the pathogenesis of *Yersinia*. *Curr Top*  
659 *Microbiol Immunol.* 2005;289:151-73. Epub 2005/03/29. PubMed PMID: 15791955.

- 660 67. Hueffer K, Galan JE. Salmonella-induced macrophage death: multiple mechanisms, different  
661 outcomes. *Cell Microbiol.* 2004;6(11):1019-25. Epub 2004/10/08. doi: 10.1111/j.1462-  
662 5822.2004.00451.x. PubMed PMID: 15469431.
- 663 68. Jarvelainen HA, Galmiche A, Zychlinsky A. Caspase-1 activation by Salmonella. *Trends Cell Biol.*  
664 2003;13(4):204-9. Epub 2003/04/02. PubMed PMID: 12667758.
- 665 69. Wan B, Poirie M, Gatti JL. Parasitoid wasp venom vesicles (venosomes) enter *Drosophila*  
666 *melanogaster* lamellocytes through a flotillin/lipid raft-dependent endocytic pathway. *Virulence.*  
667 2020;11(1):1512-21. Epub 2020/11/03. doi: 10.1080/21505594.2020.1838116. PubMed PMID:  
668 33135553; PubMed Central PMCID: PMCPCMC7605353.
- 669 70. Del Signore SJ, Biber SA, Lehmann KS, Heimler SR, Rosenfeld BH, Eskin TL, et al. dOCRL maintains  
670 immune cell quiescence by regulating endosomal traffic. *PLoS Genet.* 2017;13(10):e1007052. Epub  
671 2017/10/14. doi: 10.1371/journal.pgen.1007052. PubMed PMID: 29028801; PubMed Central PMCID:  
672 PMCPCMC5656325.
- 673 71. Shrivage BV, Hill JH, Powers CM, Wu L, Baehrecke EH. Atg6 is required for multiple vesicle  
674 trafficking pathways and hematopoiesis in *Drosophila*. *Development.* 2013;140(6):1321-9. Epub  
675 2013/02/15. doi: 10.1242/dev.089490. PubMed PMID: 23406899; PubMed Central PMCID:  
676 PMCPCMC3585664.
- 677 72. Zhou B, Yun, E.Y., Ray, L., You, J., Ip, Y.T., Lin, X. Retromer promotes immune quiescence by  
678 suppressing Spätzle-Toll pathway in *Drosophila*. *J Cell Physiology.* 2014;229:512-20.
- 679 73. Emerald BS, Cohen SM. Spatial and temporal regulation of the homeotic selector gene  
680 *Antennapedia* is required for the establishment of leg identity in *Drosophila*. *Dev Biol.* 2004;267(2):462-  
681 72. Epub 2004/03/12. doi: 10.1016/j.ydbio.2003.12.006
- 682 S0012160603007863 [pii]. PubMed PMID: 15013806.
- 683 74. Popichenko D, Sellin J, Bartkuhn M, Paululat A. Hand is a direct target of the forkhead  
684 transcription factor Biniou during *Drosophila* visceral mesoderm differentiation. *BMC Dev Biol.*  
685 2007;7:49. Epub 2007/05/22. doi: 10.1186/1471-213X-7-49. PubMed PMID: 17511863; PubMed Central  
686 PMCID: PMCPCMC1891290.
- 687 75. Stramer B, Wood W, Galko MJ, Redd MJ, Jacinto A, Parkhurst SM, et al. Live imaging of wound  
688 inflammation in *Drosophila* embryos reveals key roles for small GTPases during in vivo cell migration. *J*  
689 *Cell Biol.* 2005;168(4):567-73. Epub 2005/02/09. doi: 10.1083/jcb.200405120. PubMed PMID: 15699212;  
690 PubMed Central PMCID: PMCPCMC2171743.
- 691 76. Kurucz E, Zettervall CJ, Sinka R, Vilmos P, Pivarcsi A, Ekengren S, et al. Hemese, a hemocyte-  
692 specific transmembrane protein, affects the cellular immune response in *Drosophila*. *Proc Natl Acad Sci*  
693 *U S A.* 2003;100(5):2622-7. Epub 2003/02/25. doi: 10.1073/pnas.0436940100
- 694 0436940100 [pii]. PubMed PMID: 12598653; PubMed Central PMCID: PMC151390.
- 695 77. Tokusumi T, Shoue DA, Tokusumi Y, Stoller JR, Schulz RA. New hemocyte-specific enhancer-  
696 reporter transgenes for the analysis of hematopoiesis in *Drosophila*. *Genesis.* 2009;47(11):771-4. Epub  
697 2009/10/16. doi: 10.1002/dvg.20561. PubMed PMID: 19830816.
- 698 78. Asha H, Nagy I, Kovacs G, Stetson D, Ando I, Dearolf CR. Analysis of Ras-induced  
699 overproliferation in *Drosophila* hemocytes. *Genetics.* 2003;163(1):203-15. Epub 2003/02/15. PubMed  
700 PMID: 12586708; PubMed Central PMCID: PMC1462399.
- 701 79. Waltzer L, Ferjoux G, Bataille L, Haenlin M. Cooperation between the GATA and RUNX factors  
702 *Serpent* and *Lozenge* during *Drosophila* hematopoiesis. *EMBO J.* 2003;22(24):6516-25. Epub  
703 2003/12/06. doi: 10.1093/emboj/cdg622. PubMed PMID: 14657024; PubMed Central PMCID:  
704 PMCPCMC291817.

- 705 80. Kroeger PT, Jr., Tokusumi T, Schulz RA. Transcriptional regulation of eater gene expression in  
706 *Drosophila* blood cells. *Genesis*. 2012;50(1):41-9. Epub 2011/08/03. doi: 10.1002/dvg.20787. PubMed  
707 PMID: 21809435.
- 708 81. Goto A, Kadowaki T, Kitagawa Y. *Drosophila* hemolectin gene is expressed in embryonic and  
709 larval hemocytes and its knock down causes bleeding defects. *Dev Biol*. 2003;264(2):582-91. Epub  
710 2003/12/04. doi: S0012160603004639 [pii]. PubMed PMID: 14651939.
- 711 82. Spitzweck B, Brankatschk M, Dickson BJ. Distinct protein domains and expression patterns  
712 confer divergent axon guidance functions for *Drosophila* Robo receptors. *Cell*. 2010;140(3):409-20. Epub  
713 2010/02/11. doi: 10.1016/j.cell.2010.01.002. PubMed PMID: 20144763.
- 714 83. Wucherpennig T, Wilsch-Brauninger M, Gonzalez-Gaitan M. Role of *Drosophila* Rab5 during  
715 endosomal trafficking at the synapse and evoked neurotransmitter release. *J Cell Biol*. 2003;161(3):609-  
716 24. doi: 10.1083/jcb.200211087. PubMed PMID: 12743108; PubMed Central PMCID: PMC2172938.
- 717 84. Pulipparacharuvil S, Akbar MA, Ray S, Sevrioukov EA, Haberman AS, Rohrer J, et al. *Drosophila*  
718 Vps16A is required for trafficking to lysosomes and biogenesis of pigment granules. *J Cell Sci*.  
719 2005;118(Pt 16):3663-73. doi: 10.1242/jcs.02502. PubMed PMID: 16046475.
- 720 85. Perkins LA, Holderbaum L, Tao R, Hu Y, Sopko R, McCall K, et al. The Transgenic RNAi Project at  
721 Harvard Medical School: Resources and Validation. *Genetics*. 2015;201(3):843-52. Epub 2015/09/01. doi:  
722 10.1534/genetics.115.180208. PubMed PMID: 26320097; PubMed Central PMCID: PMC4649654.
- 723 86. Lemaitre B, Kromer-Metzger E, Michaut L, Nicolas E, Meister M, Georgel P, et al. A recessive  
724 mutation, immune deficiency (imd), defines two distinct control pathways in the *Drosophila* host  
725 defense. *Proc Natl Acad Sci U S A*. 1995;92(21):9465-9. Epub 1995/10/10. PubMed PMID: 7568155;  
726 PubMed Central PMCID: PMC40822.
- 727 87. Oyallon J, Vanzo N, Krzemien J, Morin-Poulard I, Vincent A, Crozatier M. Two Independent  
728 Functions of Collier/Early B Cell Factor in the Control of *Drosophila* Blood Cell Homeostasis. *PLoS One*.  
729 2016;11(2):e0148978. Epub 2016/02/13. doi: 10.1371/journal.pone.0148978
- 730 PONE-D-15-45333 [pii]. PubMed PMID: 26866694; PubMed Central PMCID: PMC4750865.
- 731 88. Panettieri S, Paddibhatla I, Chou J, Rajwani R, Moore R, Goncharuk T, et al. Discovery of aspirin-  
732 triggered eicosanoid-like mediators in a *Drosophila* meta-inflammation-blood tumor model. *J Cell Sci*.  
733 2019. Epub 2019/09/29. doi: 10.1242/jcs.236141. PubMed PMID: 31562189.
- 734 89. Tokusumi T, Sorrentino RP, Russell M, Ferrarese R, Govind S, Schulz RA. Characterization of a  
735 lamellocyte transcriptional enhancer located within the misshapen gene of *Drosophila melanogaster*.  
736 *PLoS One*. 2009;4(7):e6429. Epub 2009/07/31. doi: 10.1371/journal.pone.0006429. PubMed PMID:  
737 19641625; PubMed Central PMCID: PMC2713827.
- 738 90. Igaki T, Kanuka H, Inohara N, Sawamoto K, Nunez G, Okano H, et al. Drob-1, a *Drosophila*  
739 member of the Bcl-2/CED-9 family that promotes cell death. *Proc Natl Acad Sci U S A*. 2000;97(2):662-7.  
740 Epub 2000/01/19. PubMed PMID: 10639136; PubMed Central PMCID: PMC15387.
- 741 91. Struhl G, Basler K. Organizing activity of wingless protein in *Drosophila*. *Cell*. 1993;72(4):527-40.  
742 Epub 1993/02/26. doi: 0092-8674(93)90072-X [pii]. PubMed PMID: 8440019.
- 743 92. Paddibhatla I, Lee MJ, Kalamarz ME, Ferrarese R, Govind S. Role for sumoylation in systemic  
744 inflammation and immune homeostasis in *Drosophila* larvae. *PLoS Pathog*. 2010;6(12):e1001234. Epub  
745 2011/01/05. doi: 10.1371/journal.ppat.1001234. PubMed PMID: 21203476; PubMed Central PMCID:  
746 PMC3009591.
- 747 93. Condie JM, J.A. Mustard JA, Brower. DL. Generation of anti-Antennapedia monoclonal  
748 antibodies and Antennapedia protein expression in imaginal discs. *Drosophila Information Service*.  
749 1991;70:52-4.

750 94. Kurucz E, Vaczi B, Markus R, Laurinyecz B, Vilmos P, Zsamboki J, et al. Definition of *Drosophila*  
751 hemocyte subsets by cell-type specific antigens. *Acta Biol Hung*. 2007;58 Suppl:95-111. Epub  
752 2008/02/27. doi: 10.1556/ABiol.58.2007.Suppl.8. PubMed PMID: 18297797.

753 95. Brower DL, Wilcox M, Piovant M, Smith RJ, Reger LA. Related cell-surface antigens expressed  
754 with positional specificity in *Drosophila* imaginal discs. *Proc Natl Acad Sci U S A*. 1984;81(23):7485-9.  
755 Epub 1984/12/01. PubMed PMID: 6390440; PubMed Central PMCID: PMC392171.

756

757

758

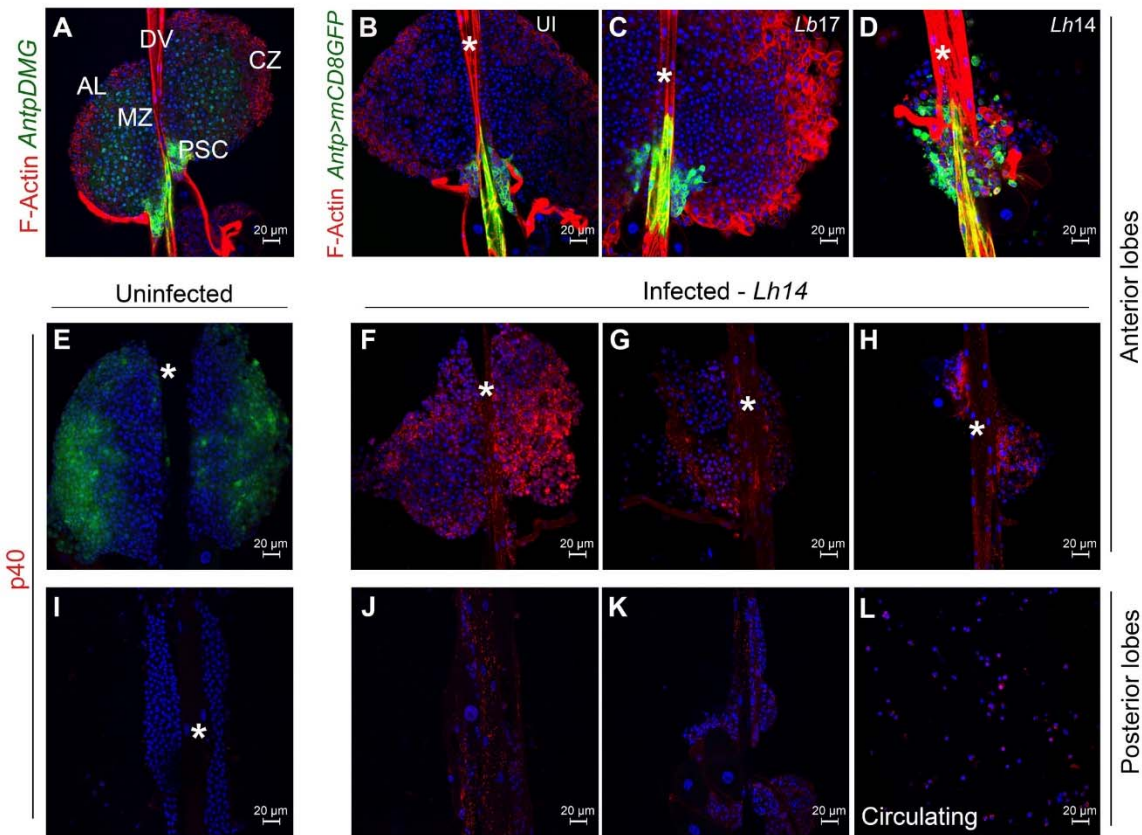

759

760 **Fig 1. *Lh* EV association with the larval lymphatic system**

761 (A) Anterior lobes (ALs, without lamellocytes) from a naive *Antp>mCD8GFP Dome-*  
762 *MESO-GFP (AntpDMG)* animal shows medullary zone (MZ), cortical zone (CZ) and  
763 posterior signaling center (PSC). The lobes flank the dorsal vessel (DV, asterisk in other  
764 panels).

765 (B-D) Anterior lobes from uninfected (UI; B), *Lb*- and *Lh*-infected (C, D) *Antp>mCD8GFP*  
766 animals. *Lb17* infection induces lamellocyte differentiation in the cortex (lamellocytes are  
767 larger than their progenitors and are rich in F-actin). The GFP-positive PSC appears  
768 unaffected. *Lh14* attack leads to loss of lobe cells; the PSC cells are not tightly-clustered  
769 and displaced from their original location.

770 (E-K) Lymph glands from *Pxn>GFP* animals. (E) GFP is expressed in the cortex of  
771 uninfected animals, but GFP expression is reduced after wasp attack (F-H). *Lh14*-infected  
772 ALs from the same infection experiment showing variability in loss of cells; *Lh* EVs (anti-  
773 SSp40 staining, referred to as p40 here and remaining figures) are seen in some cells of  
774 these lobes and within the dorsal vessel. (I-K) Posterior lobes from uninfected (I) and *Lh*-  
775 infected animals (J, K). (L) Circulating hemocytes from infected animals.

776

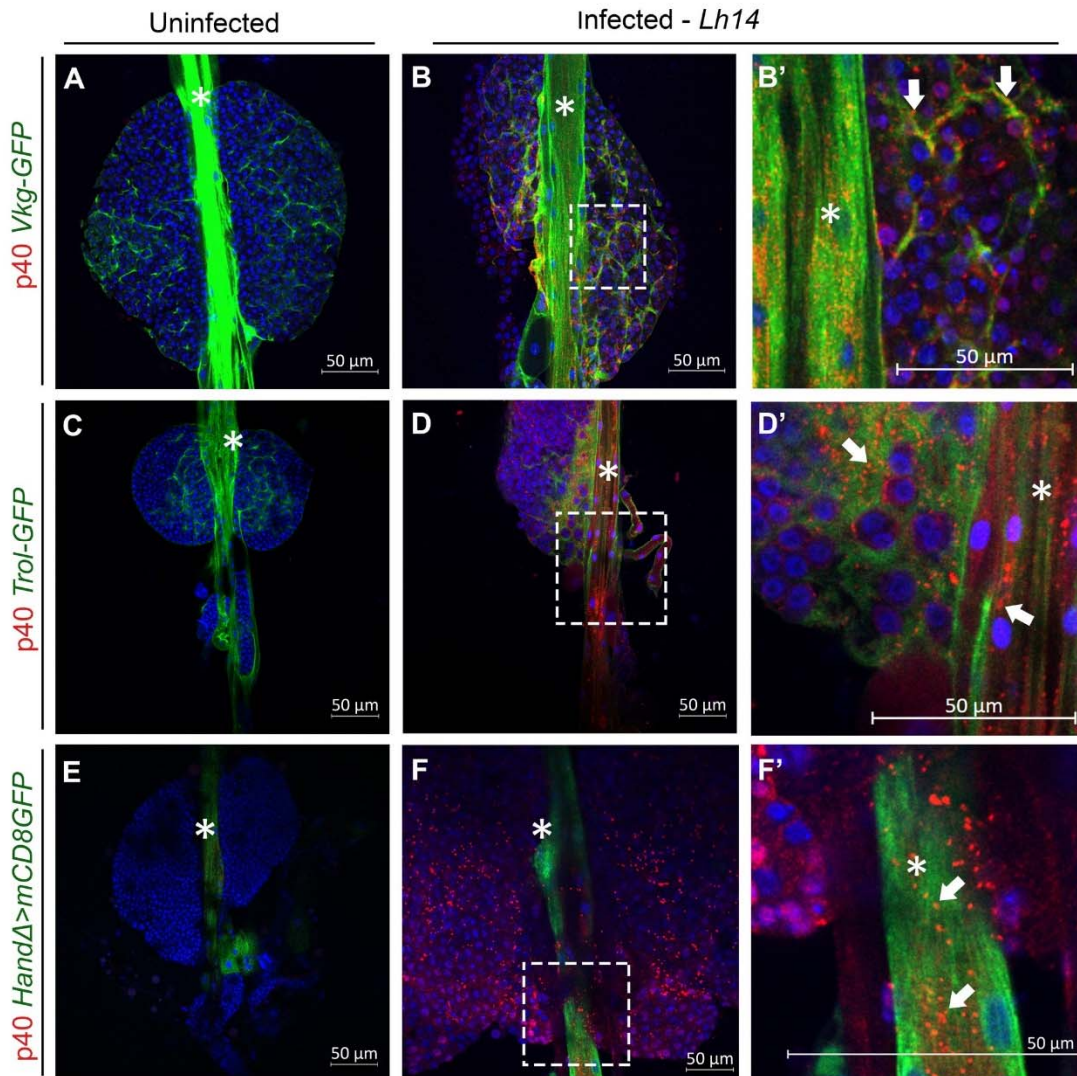

777

778 **Fig 2. *Lh* EVs association with basement membrane proteins**

779 (A-B) *Vkg-GFP* lymph glands. (A) GFP marks Collagen IV in the dorsal vessel and around  
780 lobe clusters. (B-B') *Lh* infected gland shows extensive EV puncta co-localized with GFP  
781 in the dorsal vessel (\*) and in between lobe clusters. Punctate, cytoplasmic staining in  
782 many cells throughout the anterior lobes (B, B', arrows) is also observed.

783 (C-D) *Trol-GFP* lymph glands. (C) GFP marks *Trol-GFP* distribution in naïve and (D, D',  
784 arrows) *Lh* infected animals. Co-localization of *Trol-GFP* and EV puncta are observed.

785 (E-F) *HandΔ>mCD8GFP* animals marks the cells of the dorsal vessel. (E) An intact  
786 lymph gland from a naïve animal. (F, F', arrows) EV signal localizes with the GFP signal  
787 in the cardiomyocytes.



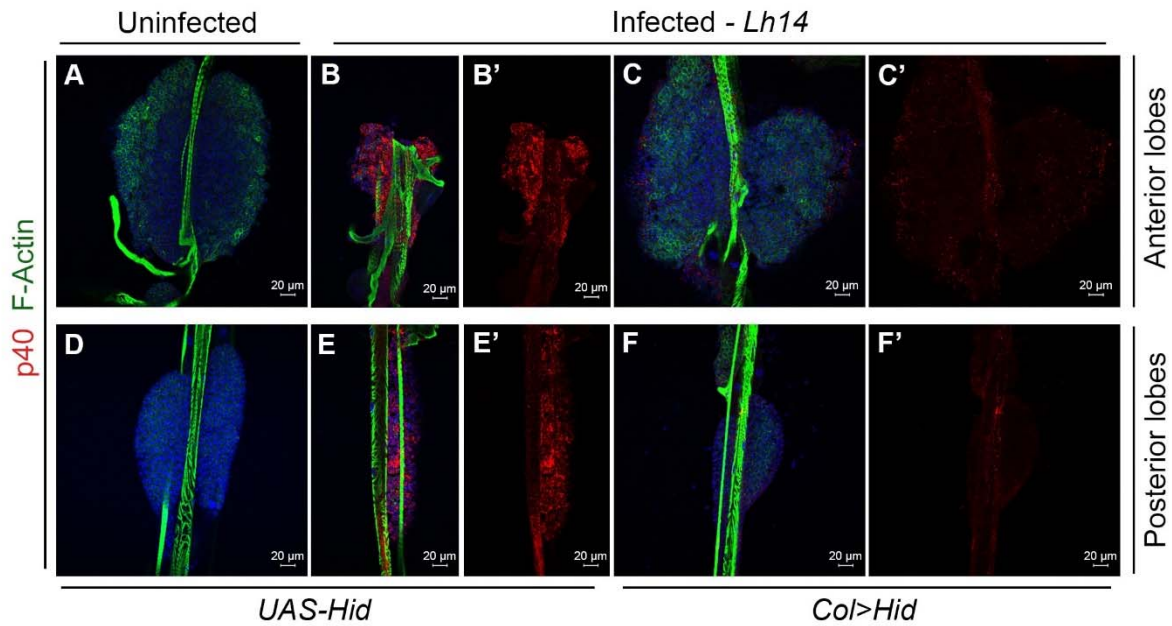

788

789

790 **Fig 3. PSC-less lymph glands from *Lh*-infected animals have intact lobes and show**  
791 **reduced EV signal**

792 **(A, D)** Anterior lobes from a naïve *UAS-Hid* host are intact and do not have EVs; anterior  
793 **(A)**, and posterior lobes **(D)**.

794 **(B, E)** Anterior lobes from a *Lh* infected *UAS-Hid* host is depleted of hemocytes and has  
795 many EVs. Anterior lobes **(B, B')**, and posterior lobes **(E, E')**.

796 **(C, F)** PSC-less lobes from a *Lh* infected *Col>Hid* host are intact with weak EV signal.  
797 Anterior **(C, C')**, and posterior lobes **(F, F')**.

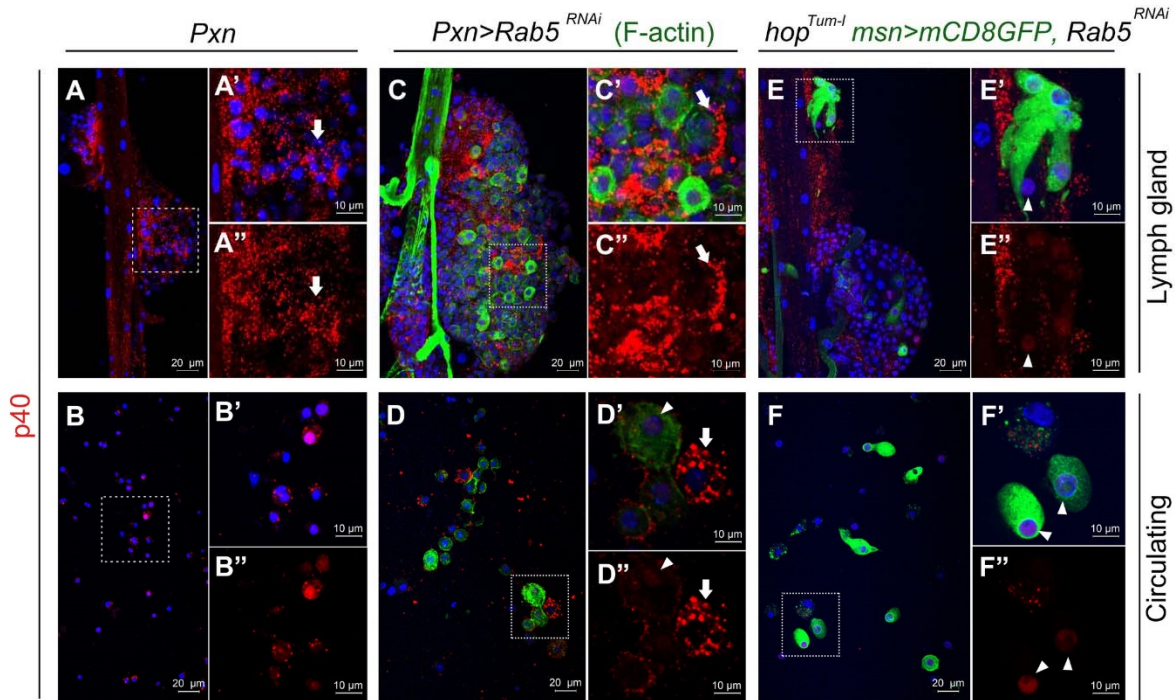

798

799

#### 800 Fig. 4. Intracellular *Lh* EV localization

801 (A, B) Anterior lobes (A-A'') and circulating hemocytes (B-B'') from *Lh*-infected *Pxn>GFP*  
802 animals showing EV uptake. Magnifications of areas in (A) and (B) are shown in A', A''  
803 and B', B'', respectively. Arrows point to internalized vesicles.

804 (C, D) An anterior lobe (C-C'') and circulating hemocytes (D-D'') from *Lh*-infected  
805 *Pxn>GFP Rab5<sup>RNAi</sup>* animals showing peripheral localization of EVs (arrow). As in Fig. 1,  
806 *Pxn>GFP* expression is reduced after wasp attack. Samples were counterstained with  
807 FITC-Phalloidin to visualize cell morphology. A larger Phalloidin-positive lamellocyte  
808 (arrowhead) remains EV negative, while smaller macrophages endocytose EVs. The EV  
809 signal is peripheral in some, but not all cells.

810 (E, F) Lobes (E-E'') and circulating hemocytes (F-F'') from *Lh*-infected GFP-positive  
811 lamellocytes of *hop<sup>Tum-I</sup> msn>mCD8GFP, Rab5<sup>RNAi</sup>* animals. Lamellocytes show a diffuse  
812 nuclear SSp40 signal (arrowhead).

813

814

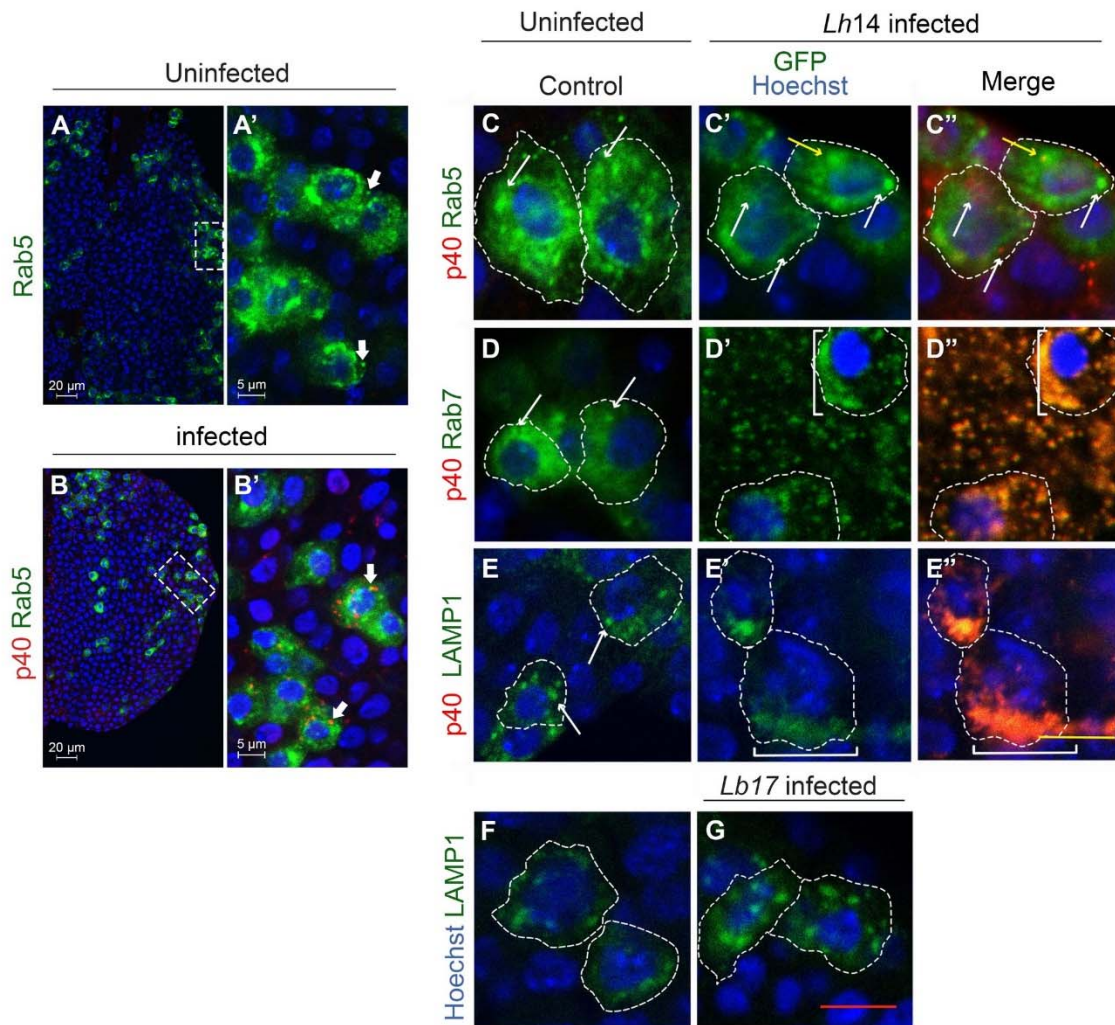

815

816

817 **Fig 5. Effects of *Lh* and *Lb* infection on retrograde transport organelles**

818 (A, B) *Hemese*>*GFP-Rab5* lymph gland lobes stained with anti-SSp40; *Lh* EVs enter  
819 Rab5 compartments, some EVs colocalize with *GFP-Rab5* (arrows).

820 (C-E) *Hemese*>*GFP-Rab5*, >*GFP-Rab7*, and >*GFP-LAMP1* expression in naïve animals  
821 or (C – E prime) *Lh*-infected animals. Individual cells are outlined. Yellow arrow in C' and  
822 C'' shows a normal Rab5 compartment with EV signal. White arrows point to normal  
823 compartment morphologies. Many *Lh* EVs are associated with grossly distorted Rab7 and  
824 LAMP1 compartments (square brackets).

825 (F, G) *Lb* infection does not distort LAMP1 compartment morphologies.

826

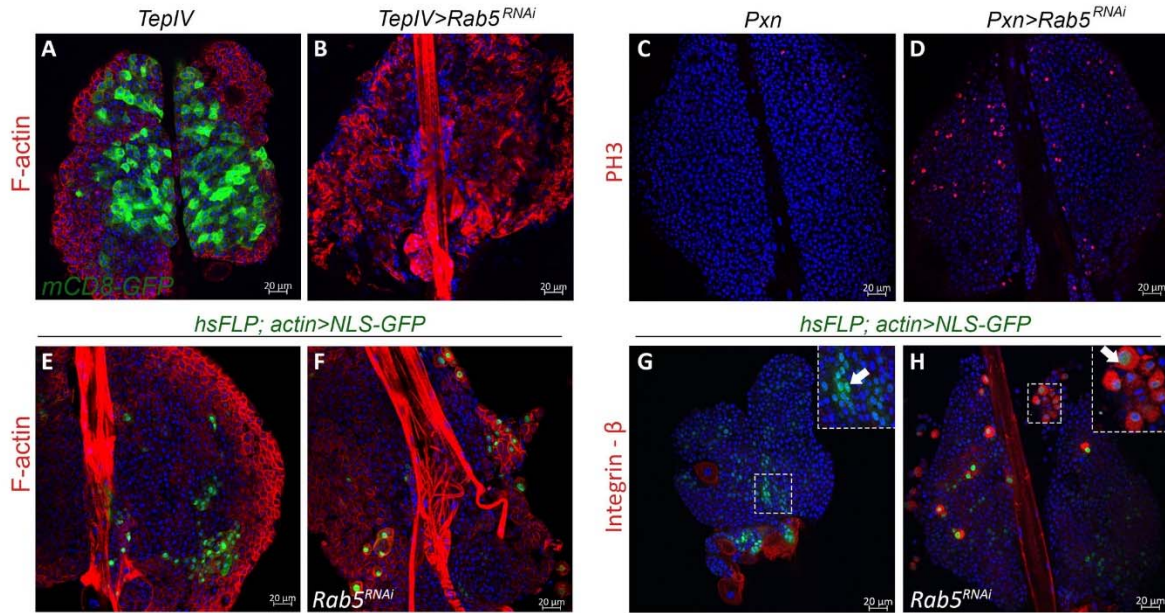

827

828 **Fig 6. *Rab5<sup>RNAi</sup>* triggers overproliferation and lamellocyte differentiation**

829 (A, B) *TepIV>Rab5<sup>RNAi</sup>* in the medullary zone drives lamellocyte differentiation.

830 Lamellocytes are rich in F-actin.

831 (C, D) High levels of mitosis (PH3-positive) are induced by *Pxn>Rab5<sup>RNAi</sup>*.

832 (E-H) Cell-autonomous inhibitory role for *Rab5* in lamellocyte differentiation.

833 (E, G) *hsFLP; actin>NLS-GFP* control clones (without *Rab5* KD) are marked with GFP

834 and do not contain lamellocytes (inset, arrow in panel G).

835 (F, H) *hsFLP; actin>NLS-GFP, Rab5<sup>RNAi</sup>* clones are composed of lamellocytes with high

836 F-actin staining (F) and are Integrin-β-positive (H). In panel H, the GFP and Integrin-β

837 signals overlap in some cells confirming lamellocyte identity (inset, arrow in panel H).

838

839  
840

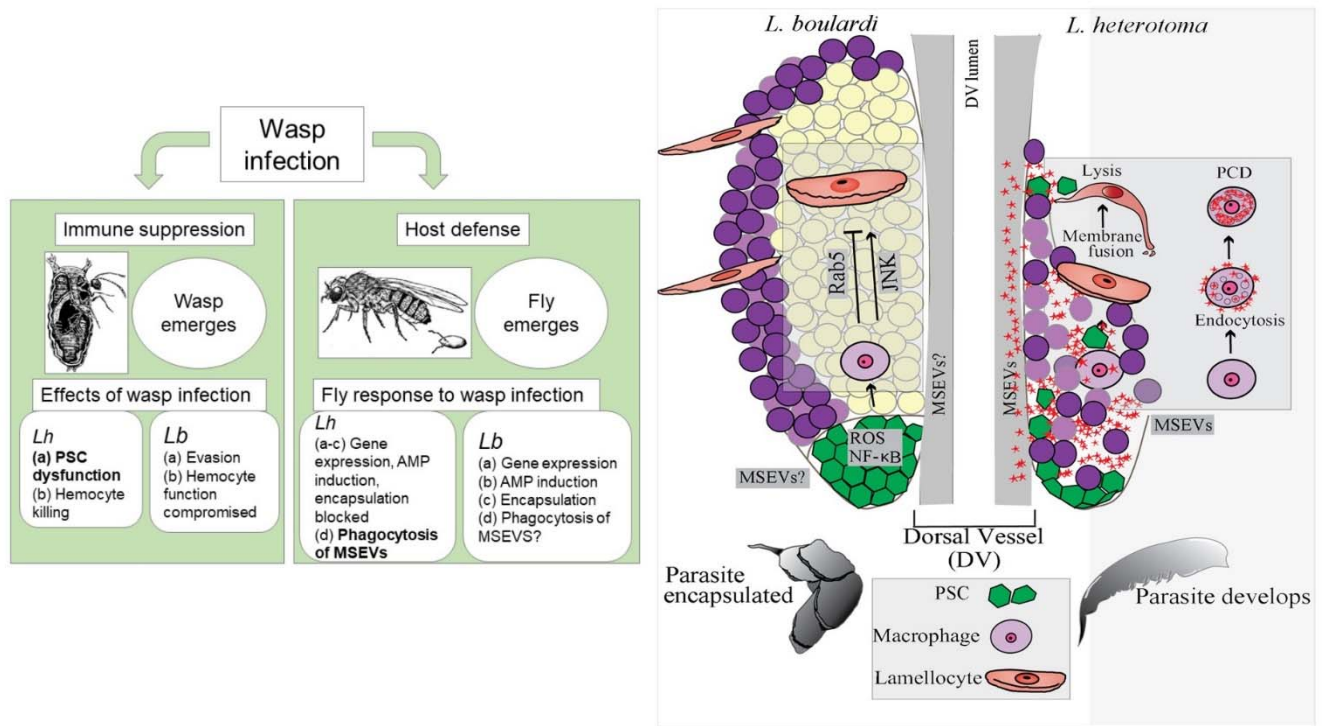

841  
842

843 **Fig 7. *Lh* EV interactions and effects on host blood cells: summary of events**

844 Left: Immune suppression by *Lh* and *Lb* wasps and host defense in response to infection.  
845 Text in bold indicates findings from this study.

846 Right: *Lb* (left lobe) attack triggers signaling events in the PSC and promotes  
847 lamellocyte differentiation of lymph gland progenitors. This process is important in host  
848 defense against parasitic wasps and is kept in check by Rab5.

849 After *Lh* infection (right lobe), *Lh* MSEVs concentrate around and disassemble the PSC.  
850 They are phagocytosed by macrophages by a Rab5-dependent endocytic mechanism.

851 In macrophages, EVs damage the phagolysosomal compartments. They are  
852 internalized by lamellocytes independently of Rab5 function. EVs lyse the few  
853 lamellocytes that differentiate post infection.

854

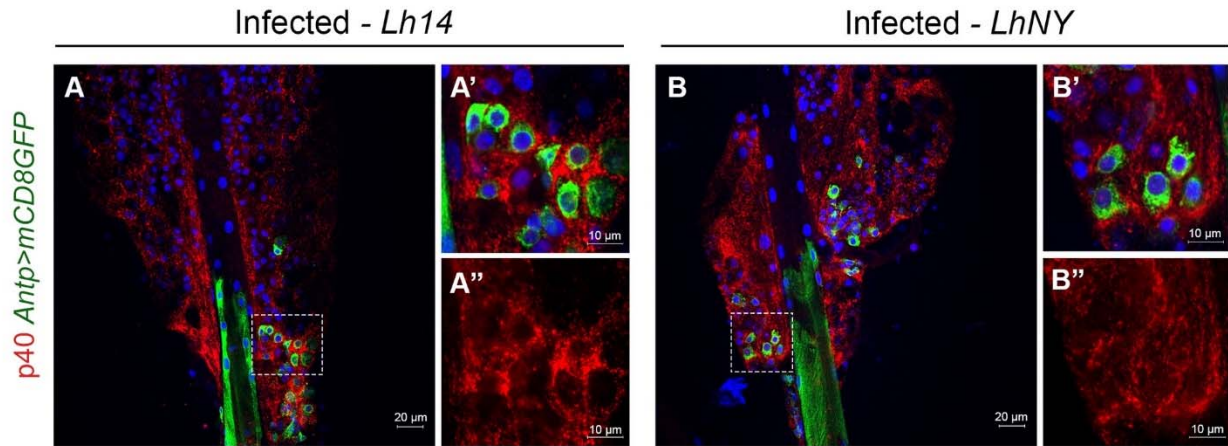

855

856

857 **Fig S1. Similar effects of different *Lh* strains**

858 (A-B) SSp40 staining of lymph glands from *Lh14*- (A-A'') or *LhNY*-infected (B-B'')

859 *Antp>mCD8GFP* hosts. Strong punctate EV signals are observed around the GFP-

860 positive PSCs and in hemocytes. Areas in the PSC are enlarged in the insets to show

861 details.

862

863

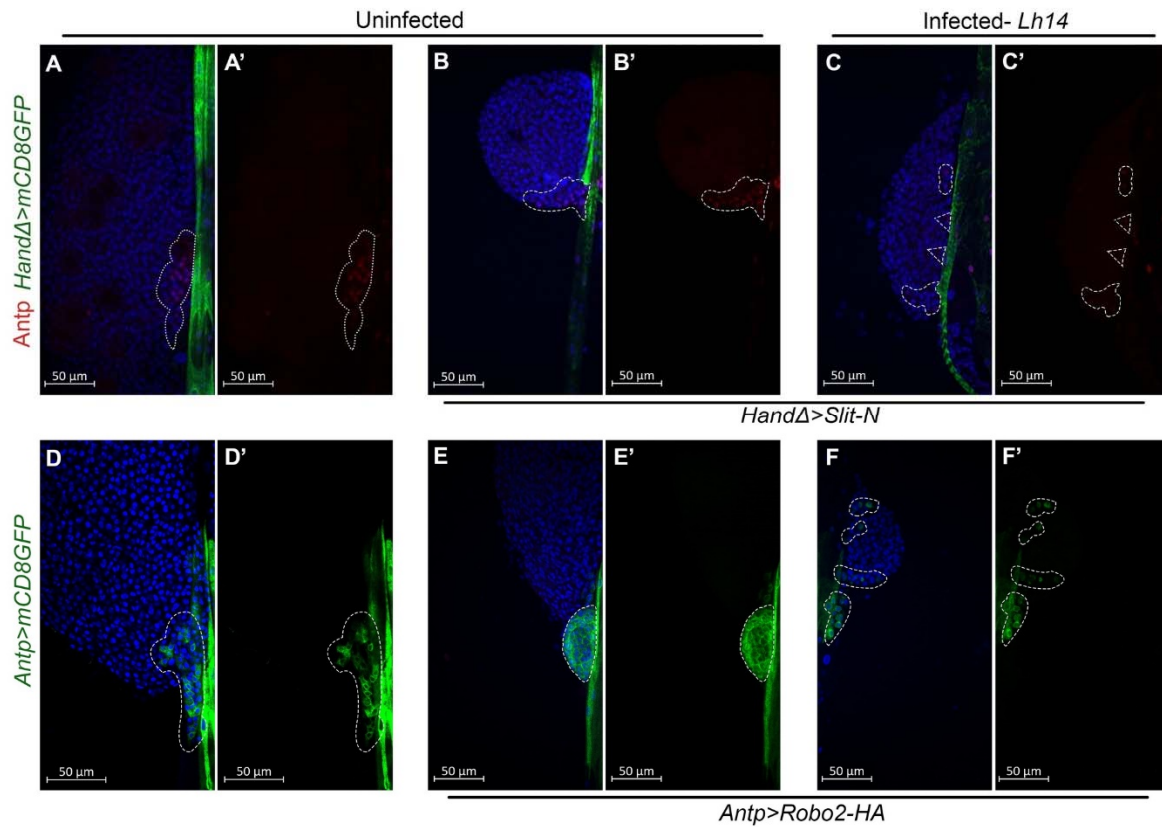

864

865

866 **Fig S2. *Lh* infection overrides Slit-Robo signaling**

867 (A-C) Antp staining of lymph glands from *HandΔ>mCD8GFP* (A-A') and  
868 *HandΔ>mCD8GFP, Slit-N* (B-C') hosts. The tight clustering of Antp-positive PSC in  
869 infected hosts is lost and the PSC is disassembled (C-C').

870 (D-F) Lymph glands from *Antp>mCD8GFP* (D-D') and *Antp>mCD8GFP, Robo2-HA* hosts  
871 (E-F'). (E-E') Robo2-HA expression tightens the GFP-positive PSC. (F-F'). *Lh* attack  
872 overrides this effect. *Lh* EVs are associated with these *Antp> mCD8GFP, Robo2-HA*  
873 *lobes* (see Fig. S3).

874

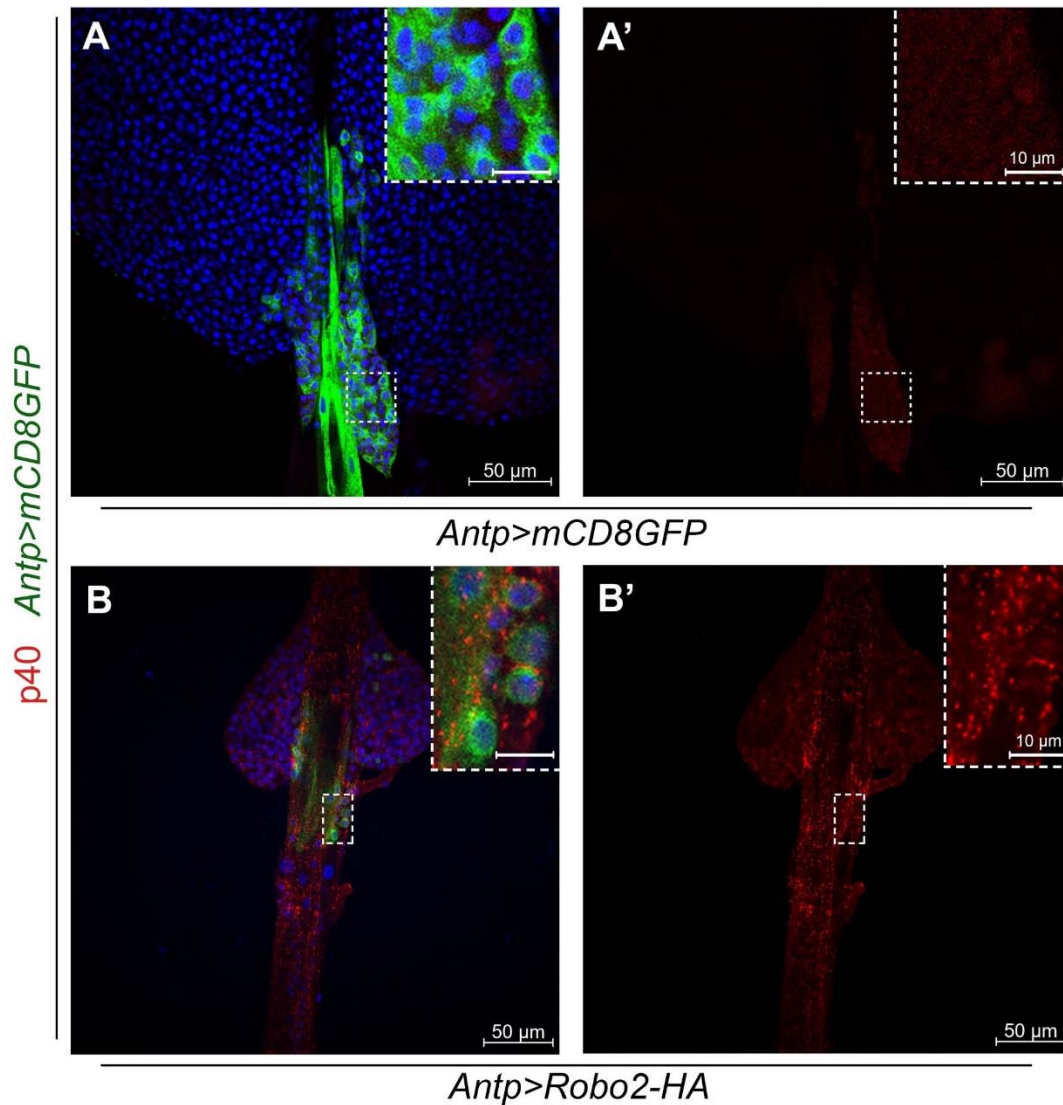

875

876 **Fig S3. *Lh* EVs are associated with *Robo2-HA* lobes**

877 Anterior lobes of lymph glands from uninfected *Antp>mCD8GFP* (**A-A'**) and

878 *Antp>mCD8GFP, Robo2-HA* animals (**B-B'**). EVs are absent in glands of naïve animals

879 (**A, A'**) but clearly observed and widely distributed in glands from infected animals. The

880 PSC cells becoming dislodged are also evident. (The sample in panels **B, B'** is the same

881 as shown in **Fig. S2**, panels **F, F'**.)



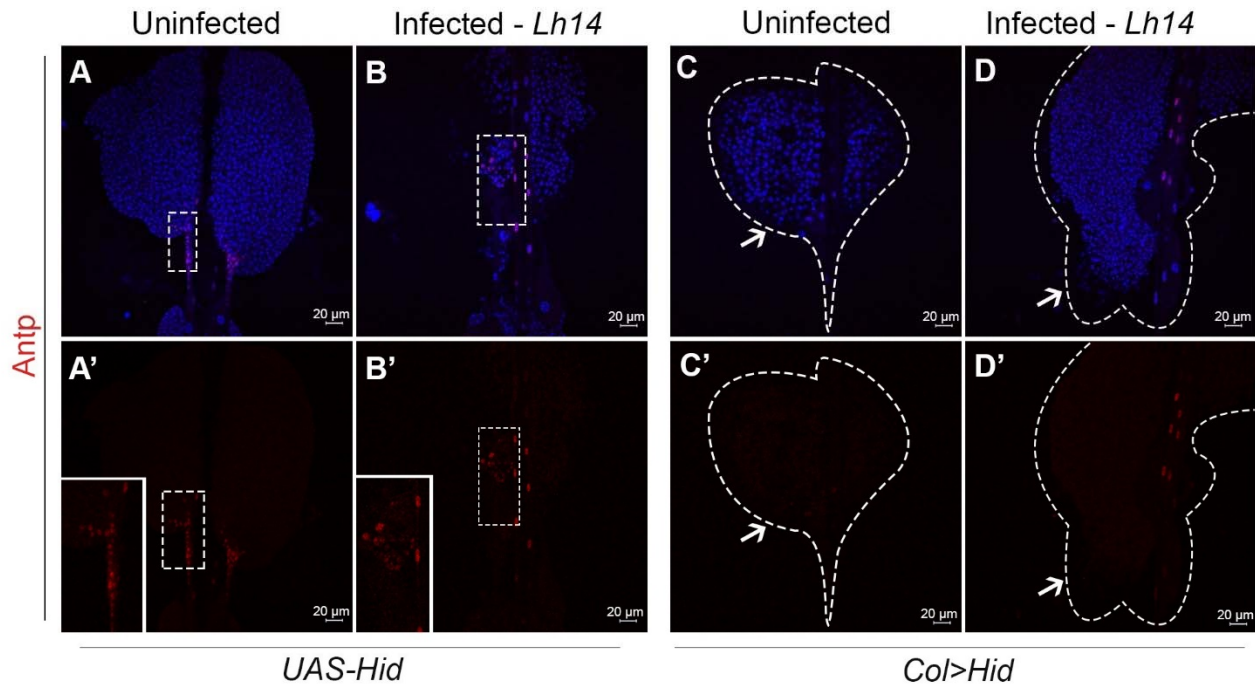

882  
883

884 **Fig S4. PSC-less lymph glands do not respond to *Lh* infection**

885 (A-A') A normal-sized and intact PSC, expresses Antp in *UAS-Hid* animals. Lobes from  
886 naïve animals have normal morphology.

887 (B-B') An Antp-positive PSC is disassembled in *UAS-Hid* animals after *Lh* infection.  
888 Lobes are reduced in size. Insets in panels A' and B' show Antp-positive PSC cells.

889 (C-D) A PSC-less lymph gland from *Col>Hid* naïve and *Lh*-infected hosts. Lobes are Antp-  
890 negative. *Col>Hid* lobes remain intact after *Lh*-infection (D-D'). The dashed lines in panels  
891 (C) and (D) show the areas in the images where biological samples are present. Arrows  
892 point to the general locations where the PSCs should have formed.

893

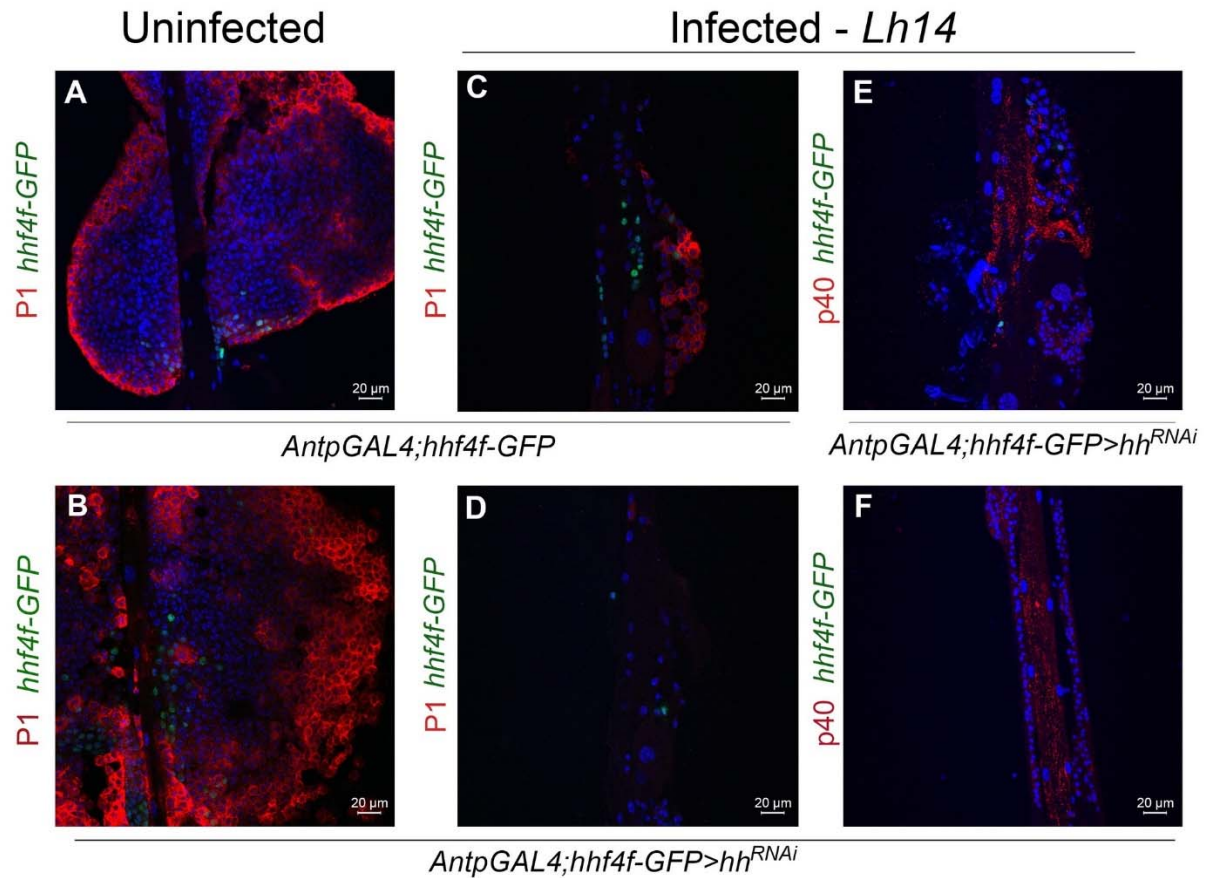

894

895 **Fig S5. *Antp>hh<sup>RNAi</sup>* PSCs respond to *Lh* infection**

896 (A, B) Lobes from naïve *AntpGAL4; hhf4f-GFP* (A) and *Antp>hh<sup>RNAi</sup>; hhf4f-GFP* (B) hosts.

897 *hh* KD increased cortical P1-positive cells.

898 (C, D) Anterior lobes from *Lh*-infected hosts showing significant hemocyte loss and

899 disassembled PSCs. In both cases, few GFP-positive PSC cells are present. P1-positive

900 cells are also present after *Lh* infection (C).

901 (E, F) Anterior (E) and posterior (F) lobes from *Lh*-infected *Antp>hh<sup>RNAi</sup>; hhf4f-GFP* hosts

902 show many EVs in the few hemocytes remaining after infection. EVs are also evident in

903 the dorsal vessel.

904

905

906

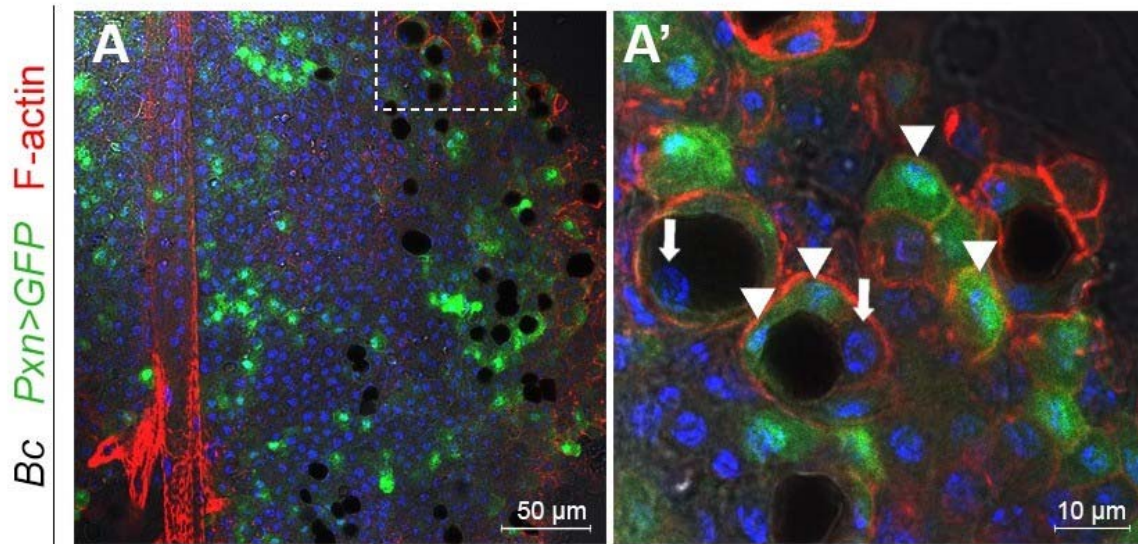

907

908 **Fig S6. Blackened crystal cells are phagocytosed by lymph gland hemocytes**

909 (A A') A *Bc/Bc<sup>+</sup> Pxn>GFP* gland showing blackened crystal cells contained within

910 *Pxn>GFP*-expressing hemocytes. Arrows points to crystal cell nuclei; arrowheads point

911 to *Pxn>GFP*-positive macrophages. Not all macrophages contain a crystal cell.

912

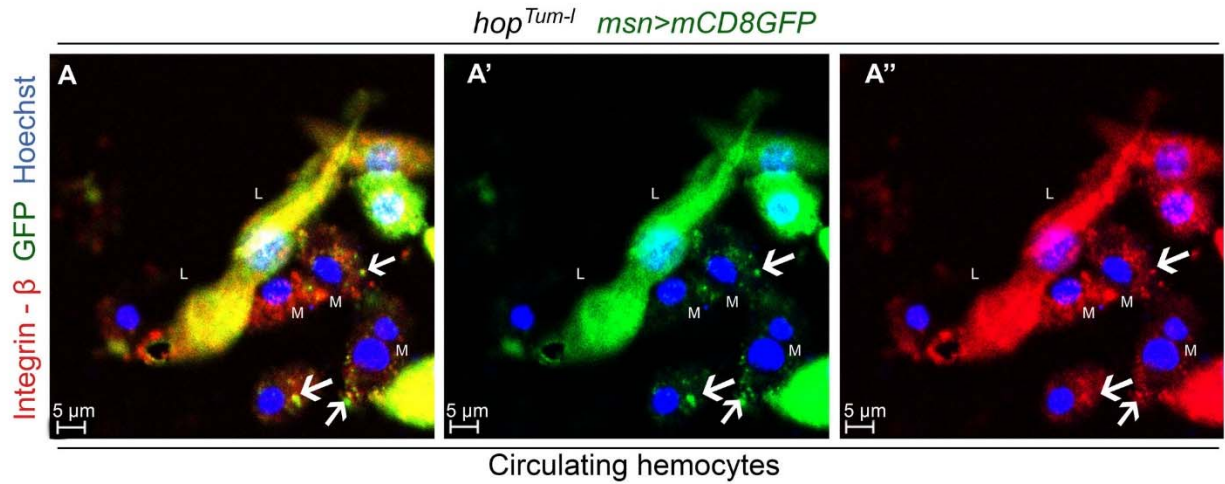

913

914

915 **Fig S7. Efferocytosis of disintegrating lamellocytes**

916 Smears from an *Lh*-infected *hop<sup>Tum-1</sup>* host in which lamellocytes (L) express *mCD8GFP*.

917 Lamellocytes also express high levels of integrin-beta. Double positive lamellocyte

918 fragments in panel **A** (pseudocolors in **A'** and **A''** are merged in panel **A**) are observed

919 in macrophages (M) indicated by arrows.

920

921

922

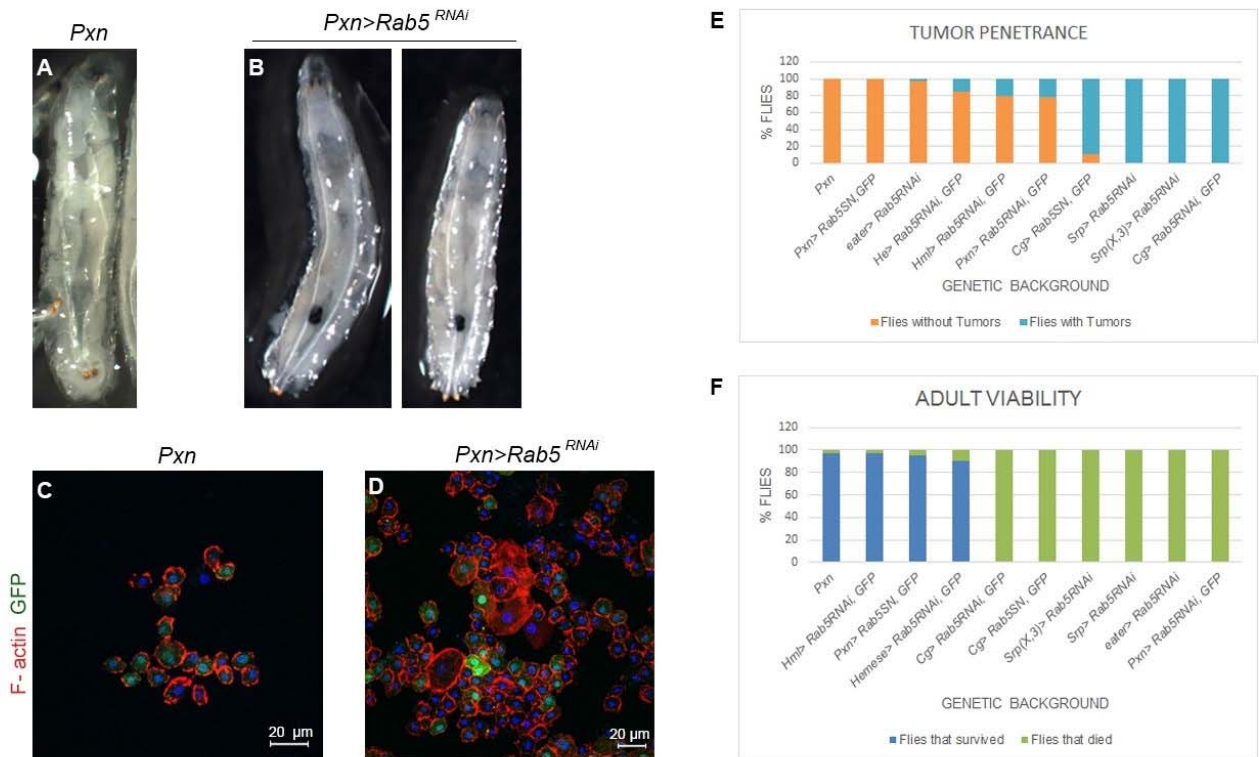

923

924

925 **Fig. S8. Tumorigenesis and lethality in *Rab5* knockdown animals**

926 **(A, B)** *Pxn>GFP*, *UAS-Rab5<sup>RNAi</sup>* larvae with melanized tumors clearly visible through the  
 927 transparent cuticle. Tumors are absent in the control animal.

928 **(C, D)** Smears from circulating hemocytes of these animals. An overabundance of  
 929 *Pxn>GFP*-positive and GFP-negative (lamellocytes) cells is observed.

930 **(E)** Tumor penetrance (animals with tumors/animals scored) in *Rab5* KD animals varied  
 931 with different GAL4 drivers.

932 **(F)** Viability to adulthood was differentially compromised. More than 100 animals were  
 933 scored for each cross in panels **(E)** and **(F)**.
